# Supplementary material for: Palladium-catalyzed α-arylation/β-elimination of sulfones
Source: Royal Society of Chemistry journal article supplement (doi:10.1039/d3nj04668k), 2023-12-11

## *Supporting Information*

### **Palladium-Catalyzed $\alpha$ -Arylation/ $\beta$ -Elimination of Sulfones**

*Mengzhao Yu,<sup>‡</sup> Luqiong Duan,<sup>‡</sup> Xinwei Zhang, Qian Zhang, Hongzhen Wang and Xiaolei Huang\**

Key Laboratory of the Ministry of Education for Advanced Catalysis Materials,  
College of Chemistry and Materials Science, Zhejiang Normal University, Jinhua,  
Zhejiang 321004, China. E-mails: huangxl@zjnu.edu.cn

## Table of Contents

- I. General remarks
- II. Detailed optimization information
- III. General procedure for  $\alpha$ -arylation/ $\beta$ -elimination of sulfones
- IV. Procedure for the gram-scale reaction
- V. General procedures for parallel control experiments
- VI. References
- VII. Copies of  $^1\text{H}$  and  $^{13}\text{C}$  NMR spectra

## I. General remarks

NMR spectra were obtained on a Bruker BBF-400 MHz, AV-400 MHz and AV-600 MHz spectrometer. The  $^1\text{H}$  NMR chemical shifts were measured relative to  $\text{CDCl}_3$  as the internal reference ( $\text{CDCl}_3$ :  $\delta = 7.26$  ppm). The  $^{13}\text{C}$  NMR chemical shifts were given using  $\text{CDCl}_3$  as the internal standard ( $\text{CDCl}_3$ :  $\delta = 77.16$  ppm). High resolution mass spectra (HRMS) were obtained with a Waters-Q-TOF-Premier (ESI). GC-MS measurements were performed on a 7890B GC system with an Agilent 5975 MSD detector. Gas chromatography (GC) analysis was performed on a Shimadzu GC-2010 instrument with Agilent J & W GC column DB-5MS-UI. Substrates **1** were prepared according to the literature.<sup>1</sup> Aryl triflates **2** were synthesized from phenols according to the literature procedures.<sup>2</sup> Unless otherwise noted, all reagents were obtained from commercial suppliers and used without further purification. Ultra dry solvents including *N,N*-dimethylformamide (DMF), dimethyl sulfoxide (DMSO), *N,N*-dimethylacetamide (DMA), *N*-Methylpyrrolidone (NMP), acetonitrile, toluene and 1,4-dioxane were purchased from J&K Scientific. Tetrahydrofuran (THF), benzene, (trifluoromethyl)benzene, xylenes and mesitylene were dried by refluxing over Na and freshly distilled prior to use.

## II. Detailed optimization information

In a nitrogen-filled glove box, a 10-mL Schlenk tube with a magnetic stir bar was charged with sulfone **1a** (30 mg, 0.12 mmol, 1.2 equiv), phenyl triflate **2a** (22.6 mg, 0.1 mmol, 1 equiv), Pd catalyst (5 mol%), ligand (14 mol%), base (0.22 mmol, 2.2 equiv) and solvent (0.8 mL). *n*- $\text{C}_{12}\text{H}_{26}$  (10  $\mu\text{L}$ ) were added as GC standard. The reaction mixture was stirred at 100  $^\circ\text{C}$  for 24 h. Aliquots were taken from the organic phase, and passed through a short plug of silica gel with EtOAc washing (about 1.5 mL). The filtrate was subjected to GC analysis to determine the yield of the product.

**Table S1** The effect of ligands

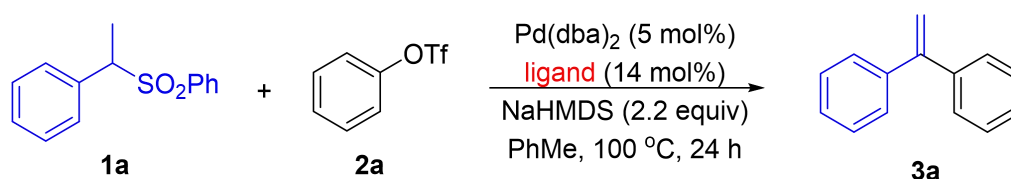

| Entry    | ligand                     | Yield <b>2a</b> (%) |
|----------|----------------------------|---------------------|
| 1        | PPh <sub>3</sub>           | 32                  |
| 2        | PCy <sub>3</sub>           | 12                  |
| 3        | XPhos                      | 25                  |
| 4        | SPhos                      | 36                  |
| <b>5</b> | <b><sup>t</sup>BuXPhos</b> | <b>87</b>           |
| 6        | BINAP                      | 75                  |
| 7        | dppe                       | 10                  |
| 8        | dppf                       | trace               |

**Table S2** The effect of palladium catalysts

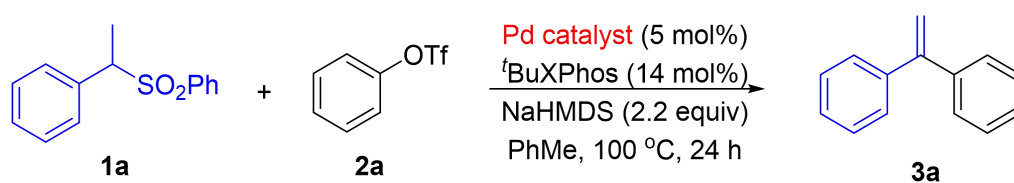

| Entry          | [Pd]                               | Yield <b>2a</b> (%) |
|----------------|------------------------------------|---------------------|
| 1              | Pd(OAc) <sub>2</sub>               | 71                  |
| <b>2</b>       | <b>Pd(dba)<sub>2</sub></b>         | <b>87</b>           |
| 3 <sup>a</sup> | Pd <sub>2</sub> (dba) <sub>3</sub> | 84                  |
| 4              | Pd(PPh <sub>3</sub> ) <sub>4</sub> | 76                  |
| 5              | PdCl <sub>2</sub>                  | 65                  |
| 6              | Pd(TMEDA)Cl <sub>2</sub>           | 74                  |
| 7              | Pd(TMEDA)Me <sub>2</sub>           | 78                  |
| 8              | Pd(TFA) <sub>2</sub>               | 85                  |

<sup>a</sup> 2.5 mol% of Pd<sub>2</sub>(dba)<sub>3</sub> was used.

**Table S3** The effect of base

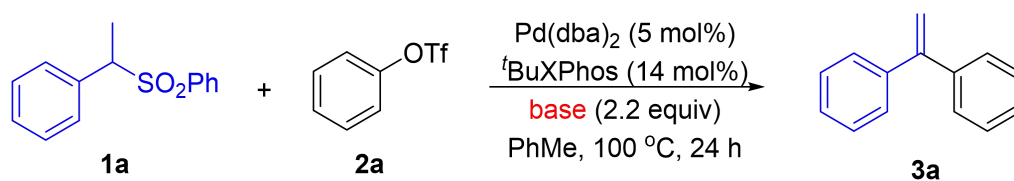

| Entry    | Base                            | Yield <b>3a</b> (%) |
|----------|---------------------------------|---------------------|
| 1        | NaH                             | 32                  |
| 2        | KHMDS                           | 65                  |
| <b>3</b> | <b>NaHMDS</b>                   | <b>87</b>           |
| 4        | LiHMDS                          | 71                  |
| 5        | KO <sup>t</sup> Bu              | 15                  |
| 6        | NaO <sup>t</sup> Bu             | 12                  |
| 7        | KOH                             | 0                   |
| 8        | Cs <sub>2</sub> CO <sub>3</sub> | 0                   |
| 9        | K <sub>3</sub> PO <sub>4</sub>  | 0                   |

**Table S4.** The effect of solvents

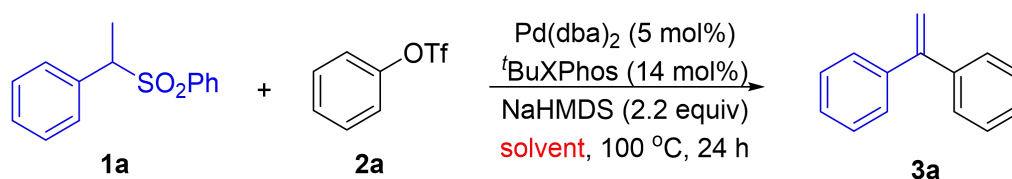

| Entry    | Solvent           | Yield <b>2a</b> (%) |
|----------|-------------------|---------------------|
| 1        | THF               | 19                  |
| 2        | 1,4-dioxane       | 14                  |
| <b>3</b> | <b>toluene</b>    | <b>87</b>           |
| 4        | PhCF <sub>3</sub> | 56                  |
| 5        | benzene           | 84                  |
| 6        | xylene            | 80                  |
| 7        | mesitylene        | 83                  |
| 8        | DMF               | 75                  |
| 9        | DMSO              | 21                  |
| 10       | DMA               | 70                  |
| 11       | NMP               | 12                  |
| 12       | MeCN              | trace               |

**Table S5.** The effect of base loadings.

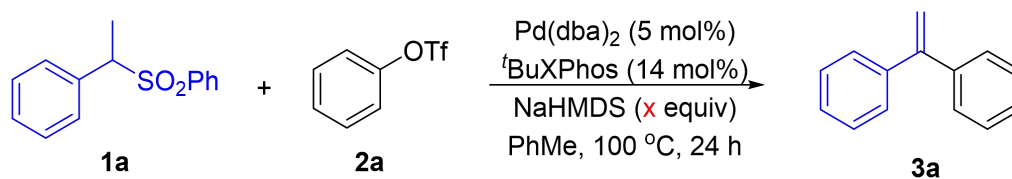

| Entry | x   | Yield <b>2a</b> (%) |
|-------|-----|---------------------|
| 1     | 1.0 | 40                  |
| 2     | 2.0 | 75                  |
| 3     | 3.0 | 62                  |
| 4     | 2.1 | 80                  |
| 5     | 2.2 | 87                  |
| 6     | 2.3 | 82                  |
| 7     | 2.5 | 70                  |

### III. General procedure for $\alpha$ -arylation/ $\beta$ -elimination of sulfones

In a nitrogen-filled glove box, a 10-mL Schlenk tube with a magnetic stir bar was charged with sulfone **1** (0.24 mmol, 1.2 equiv), phenyl triflate **2a** (0.2 mmol, 1 equiv), Pd(dba)<sub>2</sub> (5.8 mg, 5 mol%), tBuXPhos (12 mg, 14 mol%), NaHMDS (80.7 mg, 0.44 mmol, 2.2 equiv) and toluene (1.6 mL). The reaction mixture was stirred at 100 °C for 24 h. The solution was filtered through a celite pad and washed with 10 mL of dichloromethane. The filtrate was concentrated and the residue was purified by column chromatography on silica gel to provide the desired product.

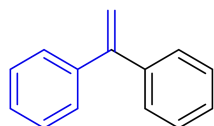

#### Ethene-1,1-diyl dibenzene (**3a**)<sup>3</sup>

Following the general procedure, product was obtained as colorless oil (30.3 mg, 84% yield). <sup>1</sup>H NMR (400 MHz, CDCl<sub>3</sub>)  $\delta$  7.37-7.33 (m, 10H), 5.48 (s, 2H); <sup>13</sup>C NMR (101 MHz, CDCl<sub>3</sub>)  $\delta$  150.2, 141.6, 128.4, 128.3, 127.9, 114.5. GC-MS (EI): Calcd for C<sub>14</sub>H<sub>12</sub>: 180.3. Found: 180.2.

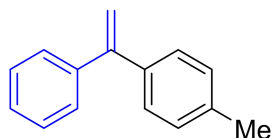

### 1-Methyl-4-(1-phenylvinyl)benzene (3b)<sup>3</sup>

Following the general procedure, product was obtained as colorless oil (35.8 mg, 92%). <sup>1</sup>H NMR (600 MHz, CDCl<sub>3</sub>) δ 7.35-7.29 (m, 5H), 7.25-7.22 (m, 2H), 7.14-7.12 (m, 2H), 5.43 (d, *J* = 1.2 Hz, 1H), 5.40 (d, *J* = 1.2 Hz, 1H), 2.36 (s, 3H); <sup>13</sup>C NMR (101 MHz, CDCl<sub>3</sub>) δ 150.1, 141.9, 138.8, 137.7, 129.0, 128.4, 128.30, 128.26, 127.8, 113.8, 21.31. GC-MS (EI): Calcd for C<sub>15</sub>H<sub>14</sub>: 194.3. Found: 194.1.

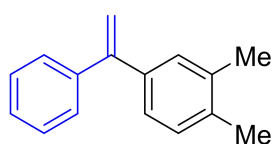

### 1,2-Ddimethyl-4-(1-phenylvinyl)benzene (3c)<sup>4</sup>

Following the general procedure, product was obtained as colorless oil (36.6 mg, 88% yield). <sup>1</sup>H NMR (400 MHz, CDCl<sub>3</sub>) δ 7.36-7.29 (m, 5H), 7.12-7.05 (m, 3H), 5.42 (s, 1H), 5.39 (s, 1H), 2.27 (s, 3H), 2.25 (s, 3H); <sup>13</sup>C NMR (101 MHz, CDCl<sub>3</sub>) δ 150.2, 141.9, 139.3, 136.4, 136.3, 129.6, 128.5, 128.2, 127.7, 125.9, 113.7, 19.9, 19.6. GC-MS (EI): Calcd for C<sub>16</sub>H<sub>16</sub>: 208.3. Found: 208.0.

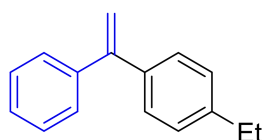

### 1-Ethyl-4-(1-phenylvinyl)benzene (3d)<sup>5</sup>

Following the general procedure, product was obtained as colorless oil (34.2 mg, 82%). <sup>1</sup>H NMR (600 MHz, CDCl<sub>3</sub>) δ 7.42-7.35 (m, 5H), 7.32 (d, *J* = 8.0 Hz, 2H), 7.21 (d, *J* = 8.0 Hz, 2H), 5.49 (s, 1H), 5.46 (s, 1H), 2.72 (q, *J* = 7.6 Hz, 2H), 1.31 (t, *J* = 7.6 Hz, 3H). <sup>13</sup>C NMR (101 MHz, CDCl<sub>3</sub>) δ 150.1, 144.0, 141.9, 139.0, 128.5, 128.34, 128.25, 127.79, 127.77, 113.8, 28.7, 15.7. GC-MS (EI): Calcd for C<sub>16</sub>H<sub>16</sub>: 208.3. Found: 208.1.

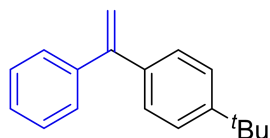

### 1-(*tert*-Butyl)-4-(1-phenylvinyl)benzene (**3e**)<sup>6</sup>

Following the general procedure, product was obtained as colorless oil (31.2 mg, 66%). <sup>1</sup>H NMR (400 MHz, CDCl<sub>3</sub>) δ 7.37-7.30 (m, 7H), 7.29-7.25 (m, 2H), 5.46 (d, *J* = 1.6 Hz, 1H), 5.40 (d, *J* = 1.6 Hz, 1H), 1.34 (s, 9H). <sup>13</sup>C NMR (101 MHz, CDCl<sub>3</sub>) δ 150.9, 150.0, 141.9, 138.6, 128.5, 128.3, 128.0, 127.8, 125.2, 113.8, 34.7, 31.5. GC-MS (EI): Calcd for C<sub>18</sub>H<sub>20</sub>: 236.4. Found: 236.2.

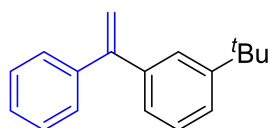

### 1-(*tert*-Butyl)-3-(1-phenylvinyl)benzene (**3f**)<sup>3</sup>

Following the general procedure, product was obtained as colorless oil (34.0 mg, 72%). <sup>1</sup>H NMR (400 MHz, CDCl<sub>3</sub>) δ 7.39-7.30 (m, 7H), 7.28-7.24 (m, 1H), 7.14-7.12 (m, 1H), 5.46 (d, *J* = 1.2 Hz, 1H), 5.45 (d, *J* = 1.6 Hz, 1H), 1.31 (s, 9H); <sup>13</sup>C NMR (101 MHz, CDCl<sub>3</sub>) δ 151.1, 150.7, 141.8, 141.3, 128.4, 128.3, 127.9, 127.8, 125.7, 125.5, 124.8, 114.1, 34.9, 31.5. GC-MS (EI): Calcd for C<sub>18</sub>H<sub>20</sub>: 236.4. Found: 236.1.

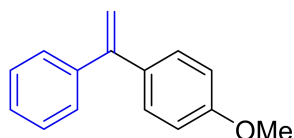

### 1-Methoxy-4-(1-phenylvinyl)benzene (**3g**)<sup>3</sup>

Following the general procedure, product was obtained as colorless oil (34.5 mg, 82%). <sup>1</sup>H NMR (400 MHz, CDCl<sub>3</sub>) δ 7.36-7.24 (m, 7H), 6.89-6.84 (m, 2H), 5.39 (d, *J* = 1.6 Hz, 1H), 5.35 (d, *J* = 1.6 Hz, 1H), 3.82 (s, 3H); <sup>13</sup>C NMR (101 MHz, CDCl<sub>3</sub>) δ 159.5, 149.7, 142.0, 134.2, 129.5, 128.5, 128.3, 127.8, 113.7, 113.1, 55.4. GC-MS (EI): Calcd for C<sub>15</sub>H<sub>14</sub>O: 210.3. Found: 210.2.

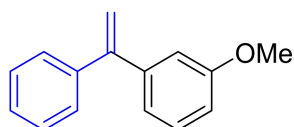



### 1-Methoxy-3-(1-phenylvinyl)benzene (3h)<sup>3</sup>

Following the general procedure, product was obtained as colorless oil (33.6 mg, 80%). <sup>1</sup>H NMR (400 MHz, CDCl<sub>3</sub>) δ 7.36-7.29 (m, 4H), 7.28-7.22 (m, 2H), 6.94-6.91 (m, 1H), 6.90-6.85 (m, 2H), 5.46 (s, 2H), 3.79 (s, 3H); <sup>13</sup>C NMR (101 MHz, CDCl<sub>3</sub>) δ 159.6, 150.1, 143.2, 141.5, 129.3, 128.4, 128.3, 127.9, 121.1, 114.6, 114.1, 113.4, 55.4. GC-MS (EI): Calcd for C<sub>15</sub>H<sub>14</sub>O: 210.3. Found: 210.0.

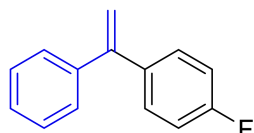

### 1-Fluoro-4-(1-phenylvinyl)benzene (3i)<sup>6</sup>

Following the general procedure, product was obtained as colorless oil (26.6 mg, 67%). <sup>1</sup>H NMR (400 MHz, CDCl<sub>3</sub>) δ 7.35-7.30 (m, 7H), 7.06-7.00 (m, 2H), 5.45 (s, 1H), 5.43 (s, 1H); <sup>13</sup>C NMR (101 MHz, CDCl<sub>3</sub>) δ 162.65 (d, *J*<sub>C-F</sub> = 246.7 Hz), 149.2, 141.4, 137.7 (d, *J*<sub>C-F</sub> = 3.3 Hz), 130.0 (d, *J*<sub>C-F</sub> = 8.0 Hz), 128.4 (d, *J*<sub>C-F</sub> = 5.1 Hz), 128.0, 115.3, 115.1, 114.4 (d, *J*<sub>C-F</sub> = 1.3 Hz); <sup>19</sup>F NMR (376 MHz, CDCl<sub>3</sub>) δ -114.8. GC-MS (EI): Calcd for C<sub>14</sub>H<sub>11</sub>F: 198.2. Found: 198.2.

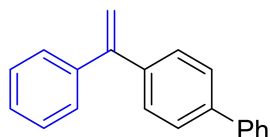

### 4-(1-Phenylvinyl)-1,1'-biphenyl (3j)<sup>7</sup>

Following the general procedure, product was obtained as colorless oil (42.5 mg, 83%). <sup>1</sup>H NMR (600 MHz, CDCl<sub>3</sub>) δ 7.72-7.70 (m, 2H), 7.68-7.64 (m, 2H), 7.55-7.41 (m, 10H), 5.62 (d, *J* = 1.2 Hz, 1H), 5.57 (d, *J* = 1.2 Hz, 1H); <sup>13</sup>C NMR (101 MHz, CDCl<sub>3</sub>) δ 149.8, 141.6, 140.8, 140.7, 140.5, 128.9, 128.8, 128.5, 128.3, 127.9, 127.5, 127.1, 127.0, 114.5. GC-MS (EI): Calcd for C<sub>20</sub>H<sub>16</sub>: 256.3. Found: 256.1.

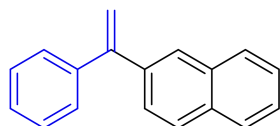

### 2-(1-Phenylvinyl)naphthalene (3k)<sup>3</sup>

Following the general procedure, product was obtained as colorless oil (38.7 mg, 84%). <sup>1</sup>H NMR (400 MHz, CDCl<sub>3</sub>) δ 7.87-7.81 (m, 4H), 7.53-7.48 (m, 3H), 7.43-7.37

(m, 5H), 5.62 (d,  $J = 0.8$  Hz, 1H), 5.58 (d,  $J = 1.2$  Hz, 1H);  $^{13}\text{C}$  NMR (101 MHz,  $\text{CDCl}_3$ )  $\delta$  150.2, 141.6, 139.0, 133.4, 133.1, 128.5, 128.4, 128.3, 127.9, 127.8, 127.7, 127.4, 126.5, 126.3, 126.1, 115.0. GC-MS (EI): Calcd for  $\text{C}_{18}\text{H}_{14}$ : 230.3. Found: 230.2.

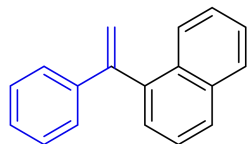

### 1-(1-Phenylvinyl)naphthalene (3l)<sup>3</sup>

Following the general procedure, product was obtained as colorless oil (34.5 mg, 75%).  $^1\text{H}$  NMR (400 MHz,  $\text{CDCl}_3$ )  $\delta$  7.94 (dd,  $J = 8.0, 3.6$  Hz, 2H), 7.87 (d,  $J = 8.4$  Hz, 1H), 7.60-7.49 (m, 3H), 7.43-7.39 (m, 3H), 7.35-7.31 (m, 3H), 6.07 (d,  $J = 1.6$  Hz, 1H), 5.49 (d,  $J = 1.6$  Hz, 1H);  $^{13}\text{C}$  NMR (101 MHz,  $\text{CDCl}_3$ )  $\delta$  148.4, 141.2, 139.9, 133.8, 132.0, 128.5, 128.3, 128.1, 127.8, 127.4, 126.8, 126.6, 126.0, 125.8, 125.6, 116.4. GC-MS (EI): Calcd for  $\text{C}_{18}\text{H}_{14}$ : 230.3. Found: 230.2.

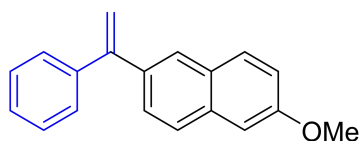

### 2-Methoxy-6-(1-phenylvinyl)naphthalene (3m)<sup>6</sup>

Following the general procedure, product was obtained as colorless oil (46.3 mg, 89%).  $^1\text{H}$  NMR (400 MHz,  $\text{CDCl}_3$ )  $\delta$  7.72-7.68 (m, 3H), 7.46 (dd,  $J = 8.4, 1.6$  Hz, 1H), 7.41-7.34 (m, 5H), 7.16-7.13 (m, 2H), 5.57 (d,  $J = 1.2$  Hz, 1H), 5.51 (d,  $J = 1.2$  Hz, 1H);  $^{13}\text{C}$  NMR (101 MHz,  $\text{CDCl}_3$ )  $\delta$  158.0, 150.2, 141.9, 136.9, 134.3, 129.9, 128.9, 128.6, 128.4, 127.9, 127.3, 127.0, 126.7, 119.1, 114.3, 105.8, 55.5. GC-MS (EI): Calcd for  $\text{C}_{19}\text{H}_{16}\text{O}$ : 260.3. Found: 260.1.

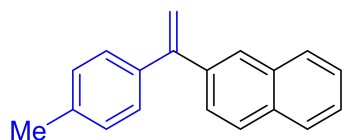

### 2-(1-(*p*-Tolyl)vinyl)naphthalene (4a)<sup>3</sup>

Following the general procedure, product was obtained as colorless oil (31.8 mg, 65%).  $^1\text{H}$  NMR (400 MHz,  $\text{CDCl}_3$ )  $\delta$  7.86-7.92 (m, 4H), 7.51-7.46 (m, 3H), 7.30 (d,  $J = 8.0$  Hz, 2H), 7.18 (d,  $J = 8.0$  Hz, 2H), 5.55 (s, 1H), 5.54 (s, 1H), 2.40 (s, 3H);  $^{13}\text{C}$

NMR (101 MHz, CDCl<sub>3</sub>)  $\delta$  150.1, 139.3, 138.8, 137.8, 133.5, 133.1, 129.1, 128.4, 128.3, 127.8, 127.7, 127.4, 126.7, 126.3, 126.1, 114.3, 21.35. GC-MS (EI): Calcd for C<sub>19</sub>H<sub>16</sub>: 244.3. Found: 244.2.

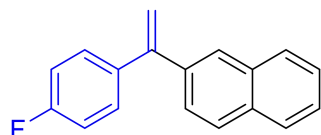

### 2-(1-(4-Fluorophenyl)vinyl)naphthalene (4b)<sup>8</sup>

Following the general procedure, product was obtained as colorless oil (33.8 mg, 68%). <sup>1</sup>H NMR (400 MHz, CDCl<sub>3</sub>)  $\delta$  7.86-7.76 (m, 4H), 7.51-7.45 (m, 3H), 7.38-7.32 (m, 2H), 7.08-7.02 (m, 2H), 5.57 (s, 1H), 5.51 (s, 1H); <sup>13</sup>C NMR (101 MHz, CDCl<sub>3</sub>)  $\delta$  162.7 (d,  $J_{C-F}$  = 246.9 Hz), 149.2, 138.9, 137.7 (d,  $J_{C-F}$  = 3.3 Hz), 133.4, 133.2, 130.1 (d,  $J_{C-F}$  = 8.1 Hz), 128.3, 128.0, 127.8, 127.4, 126.40 (d,  $J_{C-F}$  = 1.4 Hz), 126.3, 115.4, 115.1, 114.9; <sup>19</sup>F NMR (376 MHz, CDCl<sub>3</sub>)  $\delta$  -114.6. GC-MS (EI): Calcd for C<sub>18</sub>H<sub>13</sub>F: 248.3. Found: 248.2.

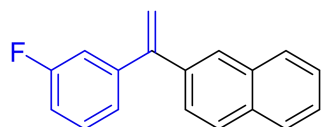

### 2-(1-(3-Fluorophenyl)vinyl)naphthalene (4c)

Following the general procedure, product was obtained as colorless oil (30.8 mg, 62%). <sup>1</sup>H NMR (400 MHz, CDCl<sub>3</sub>)  $\delta$  7.84-7.75 (m, 3H), 7.72-7.70 (m, 1H), 7.54 (dd,  $J$  = 8.8, 2.0 Hz, 1H), 7.48-7.45 (m, 2H), 7.37-7.33 (m, 2H), 7.21-7.10 (m, 2H), 5.91 (s, 1H), 5.54 (s, 1H); <sup>13</sup>C NMR (101 MHz, CDCl<sub>3</sub>)  $\delta$  160.4 (d,  $J_{C-F}$  = 248.5 Hz), 144.3, 138.1, 133.5, 133.2, 131.8 (d,  $J_{C-F}$  = 3.7 Hz), 129.6 (d,  $J_{C-F}$  = 8.1 Hz), 128.4, 128.0, 127.7, 126.3, 126.2, 125.0, 124.2 (d,  $J_{C-F}$  = 3.7 Hz), 117.7 (d,  $J_{C-F}$  = 2.2 Hz), 116.1, 115.9; <sup>19</sup>F NMR (376 MHz, CDCl<sub>3</sub>)  $\delta$  -113.2. HRMS (ESI): calcd for C<sub>18</sub>H<sub>14</sub>F [M+H]<sup>+</sup> 249.1080, found 249.1071.

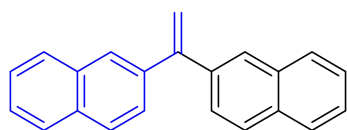

### 2,2'-(Ethene-1,1-diyl)dinaphthalene (4d)<sup>9</sup>

Following the general procedure, product was obtained as a white solid (47.7 mg,

85%).  $^1\text{H}$  NMR (400 MHz,  $\text{CDCl}_3$ )  $\delta$  7.87-7.75 (m, 8H), 7.54-7.43 (m, 6H), 5.67 (s, 2H);  $^{13}\text{C}$  NMR (101 MHz,  $\text{CDCl}_3$ )  $\delta$  150.2, 139.1, 133.5, 133.2, 128.4, 127.9, 127.8, 127.6, 126.6, 126.4, 126.2, 115.5. HRMS (ESI): calcd for  $\text{C}_{22}\text{H}_{17}$   $[\text{M}+\text{H}]^+$  281.1330, found 281.1334.

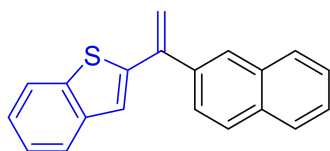

#### 2-(1-(Naphthalen-2-yl)vinyl)benzo[b]thiophene (4e)

Following the general procedure, product was obtained as colorless oil (49.3 mg, 86%).  $^1\text{H}$  NMR (400 MHz,  $\text{CDCl}_3$ )  $\delta$  7.96 (s, 1H), 7.90-7.85 (m, 3H), 7.82-7.80 (m, 1H), 7.66-7.64 (m, 1H), 7.60 (dd,  $J = 8.4, 1.6$  Hz, 1H), 7.54-7.50 (m, 2H), 7.35-7.30 (m, 2H), 7.12 (s, 1H), 5.80 (s, 1H), 5.51 (s, 1H);  $^{13}\text{C}$  NMR (101 MHz,  $\text{CDCl}_3$ )  $\delta$  144.9, 144.0, 140.3, 139.7, 138.1, 133.4, 133.3, 128.4, 128.0, 127.8, 127.6, 126.7, 126.5, 126.4, 124.9, 124.6, 123.9, 122.3, 116.5. HRMS (ESI): calcd for  $\text{C}_{20}\text{H}_{15}\text{S}$   $[\text{M}+\text{H}]^+$  287.0894, found 287.0891.

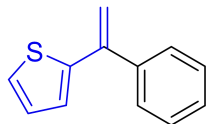

#### 2-(1-Phenylvinyl)thiophene (4f)<sup>7</sup>

Following the general procedure, product was obtained as colorless oil (31.3 mg, 84%).  $^1\text{H}$  NMR (400 MHz,  $\text{CDCl}_3$ )  $\delta$  7.50-7.45 (m, 2H), 7.42-7.37 (m, 3H), 7.27-7.25 (m, 1H), 7.02-7.00 (m, 1H), 6.94 (dd,  $J = 3.6, 1.2$  Hz, 1H), 5.62 (s, 1H), 5.28 (s, 1H);  $^{13}\text{C}$  NMR (101 MHz,  $\text{CDCl}_3$ )  $\delta$  144.9, 143.5, 141.2, 128.4, 128.3, 128.2, 127.4, 126.6, 125.2, 113.8. GC-MS (EI): Calcd for  $\text{C}_{12}\text{H}_{10}\text{S}$ : 186.3. Found: 186.2.

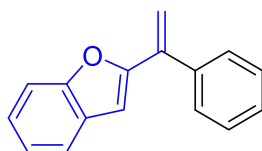

#### 2-(1-Phenylvinyl)benzofuran (4g)

Following the general procedure, product was obtained as colorless oil (33.0 mg, 75%).  $^1\text{H}$  NMR (400 MHz,  $\text{CDCl}_3$ )  $\delta$  7.54-7.51 (m, 4H), 7.45-7.41 (m, 3H), 7.34-7.30 (m, 1H), 7.22 (td,  $J = 7.6, 0.8$  Hz, 1H), 6.56 (s, 1H), 6.08 (d,  $J = 1.6$  Hz, 1H), 5.46 (d,

$J = 1.2$  Hz, 1H);  $^{13}\text{C}$  NMR (101 MHz,  $\text{CDCl}_3$ )  $\delta$  156.0, 155.1, 139.6, 139.4, 129.0, 128.6, 128.5, 128.4, 124.9, 123.0, 121.3, 115.2, 111.2, 106.0. HRMS (ESI): calcd for  $\text{C}_{16}\text{H}_{13}\text{O}$   $[\text{M}+\text{H}]^+$  221.0966, found 221.0971.

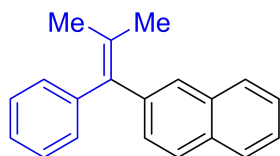

#### 2-(2-Methyl-1-phenylprop-1-en-1-yl)naphthalene (4h)

Following the general procedure, product was obtained as colorless oil (38.8 mg, 75%).  $^1\text{H}$  NMR (400 MHz,  $\text{CDCl}_3$ )  $\delta$  7.80-7.76 (m, 2H), 7.73 (d,  $J = 8.8$  Hz, 1H), 7.62 (d,  $J = 1.6$  Hz, 1H), 7.44-7.41 (m, 2H), 7.28-7.17 (m, 6H), 1.86 (s, 3H), 1.85 (s, 3H);  $^{13}\text{C}$  NMR (101 MHz,  $\text{CDCl}_3$ )  $\delta$  143.4, 141.0, 137.2, 133.4, 132.1, 131.7, 130.2, 128.6, 128.5, 128.04, 128.02, 127.7, 127.5, 126.3, 126.0, 125.7, 22.8, 22.7. HRMS (ESI): calcd for  $\text{C}_{20}\text{H}_{19}$   $[\text{M}+\text{H}]^+$  259.1487, found 259.1481.

#### IV. Procedure for the gram-scale reaction

In a nitrogen-filled glove box, a 100-mL thick-walled Schlenk tube with a magnetic stir bar was charged with sulfone **1a** (1 g, 4.1 mmol, 1.2 equiv), phenyl triflate **2a** (0.77 g, 3.4 mmol, 1 equiv),  $\text{Pd}(\text{dba})_2$  (96 mg, 5 mol%),  $^t\text{BuXPhos}$  (202 mg, 14 mol%), NaHMDS (1.37 g, 6.8 mmol, 2.2 equiv) and toluene (20 mL). The reaction mixture was stirred at 100 °C for 24 h. The solution was filtered through a celite pad and washed with 30 mL of dichloromethane. The filtrate was concentrated and the residue was purified by column chromatography on silica gel to provide the desired product (0.45 g, 73%).

#### V. General procedures for parallel control experiments

##### 1. The coupling of styrene with phenyl triflate **2a**

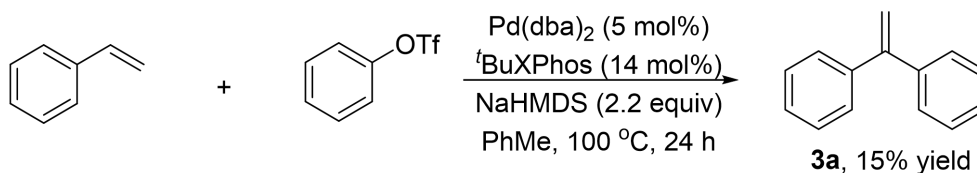

In a nitrogen-filled glove box, a 10-mL Schlenk tube with a magnetic stir bar was charged with styrene (28  $\mu\text{L}$ , 0.24 mmol, 1.2 equiv), phenyl triflate **2a** (45.2 mg, 0.2 mmol, 1 equiv),  $\text{Pd}(\text{dba})_2$  (5.8 mg, 5 mol%),  $^t\text{BuXPhos}$  (12 mg, 14 mol%), NaHMDS

(80.7 mg, 0.44 mmol, 2.2 equiv) and toluene (1.6 mL). The reaction mixture was stirred at 100 °C for 24 h. The solution was filtered through a celite pad and washed with 10 mL of dichloromethane. The filtrate was concentrated and the residue was purified by column chromatography on silica gel to provide the desired product in 15% yield.

2. The coupling of (1-tosylethane-1,1-diyl)dibenzene **5** with phenyl triflate **2a**

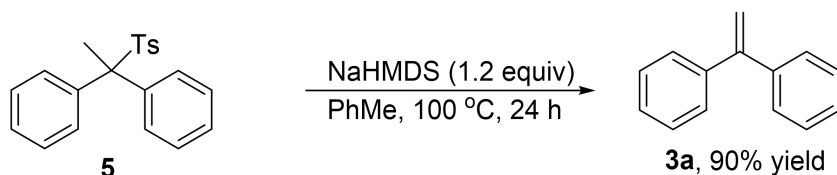

In a nitrogen-filled glove box, a 10-mL Schlenk tube with a magnetic stir bar was charged with **5** (67 mg, 0.2 mmol), NaHMDS (44 mg, 0.24 mmol, 1.2 equiv) and toluene (1.6 mL). The reaction mixture was stirred at 100 °C for 24 h. The solution was filtered through a celite pad and washed with 10 mL of dichloromethane. The filtrate was concentrated and the residue was purified by column chromatography on silica gel to provide the desired product in 90% yield.

*Compound 5 was synthesized according to the literature procedure.*<sup>10</sup> The NMR data of compound **5**: <sup>1</sup>H NMR (400 MHz, CDCl<sub>3</sub>) δ 7.52-7.50 (m, 4H), 7.32-7.25 (m, 6H), 7.17 (d, *J* = 8.4 Hz, 2H), 7.03 (d, *J* = 8.0 Hz, 2H), 2.34 (s, 3H), 2.08 (s, 3H); <sup>13</sup>C NMR (101 MHz, CDCl<sub>3</sub>) δ 144.2, 139.5, 133.8, 130.5, 129.7, 128.7, 128.11, 128.07, 75.1, 26.1, 21.7. HRMS (ESI): calcd for C<sub>21</sub>H<sub>24</sub>NO<sub>2</sub>S [M+NH<sub>4</sub>]<sup>+</sup> 354.1528, found 354.1536.

## VI. References

1. (a) X.-W. Feng, J. Wang, J. Zhang, J. Yang, N. Wang and X.-Q. Yu, *Org. Lett.*, 2010, **12**, 4408-4411; (b) Y. Maekawa, Z. T. Ariki, M. Nambo and C. M. Crudden, *Org. Biomol. Chem.*, 2019, **17**, 7300-7303.
2. L.-C. Cui, Z.-Q. Zhang, X. Lu, B. Xiao and Y. Fu, *RSC Adv.*, 2016, **6**, 51932-51935.
3. Y. Zou, L. Qin, X. Ren, Y. Lu, Y. Li and J. S. Zhou, *Chem. Eur. J.*, 2013, **19**, 3504-3511.

4. Y.-M. Feng, X.-D. Nie, J.-T. Sun, W.-K. Xu and B.-G. Wei, *Org. Biomol. Chem.*, 2021, **19**, 7883-7893.
5. Y.-Y. Cheng, J.-X. Yu, T. Lei, H.-Y. Hou, B. Chen, C.-H. Tung and L.-Z. Wu, *Angew. Chem. Int. Ed.*, 2021, **60**, 26822-26828.
6. C. Lei, Y. J. Yip and J. S. Zhou, *J. Am. Chem. Soc.* 2017, **139**, 6086-6089.
7. J. Chen, J. W. Lim, D. Y. Ong and S. Chiba, *Chem. Sci.*, 2022, **13**, 99-104.
8. D. Lamaa, E. Messe, V. Gandon, M. Alami and A. Hamze, *Org. Lett.*, 2019, **21**, 8708-8712
9. X. Shen, P. Liu, Y. Liu, B. Dai, *Tetrahedron*, 2017, **73**, 6558-6563.
10. F. Schoenebeck, J. A. Murphy, S. Z. Zhou, Y. Uenoyama, Y. Miclo and T. Tuttle, *J. Am. Chem. Soc.*, 2007, **129**, 13368-13369.

## VII. Copies of $^1\text{H}$ and $^{13}\text{C}$ NMR spectra

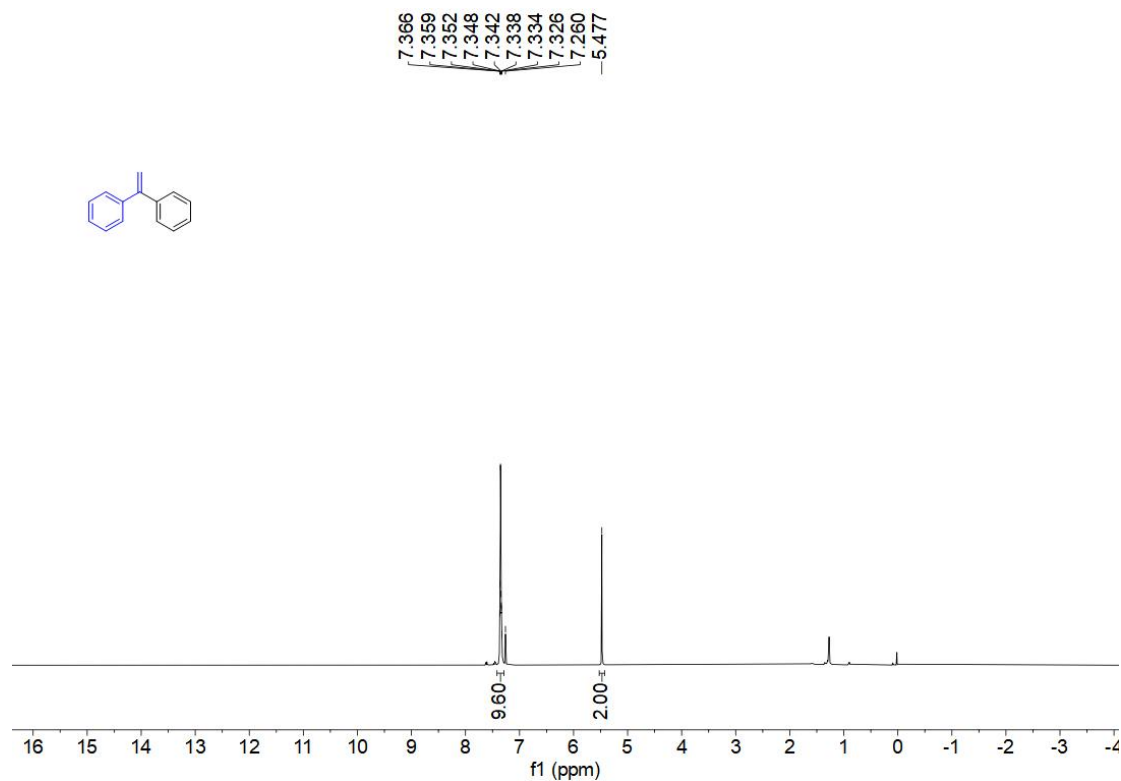

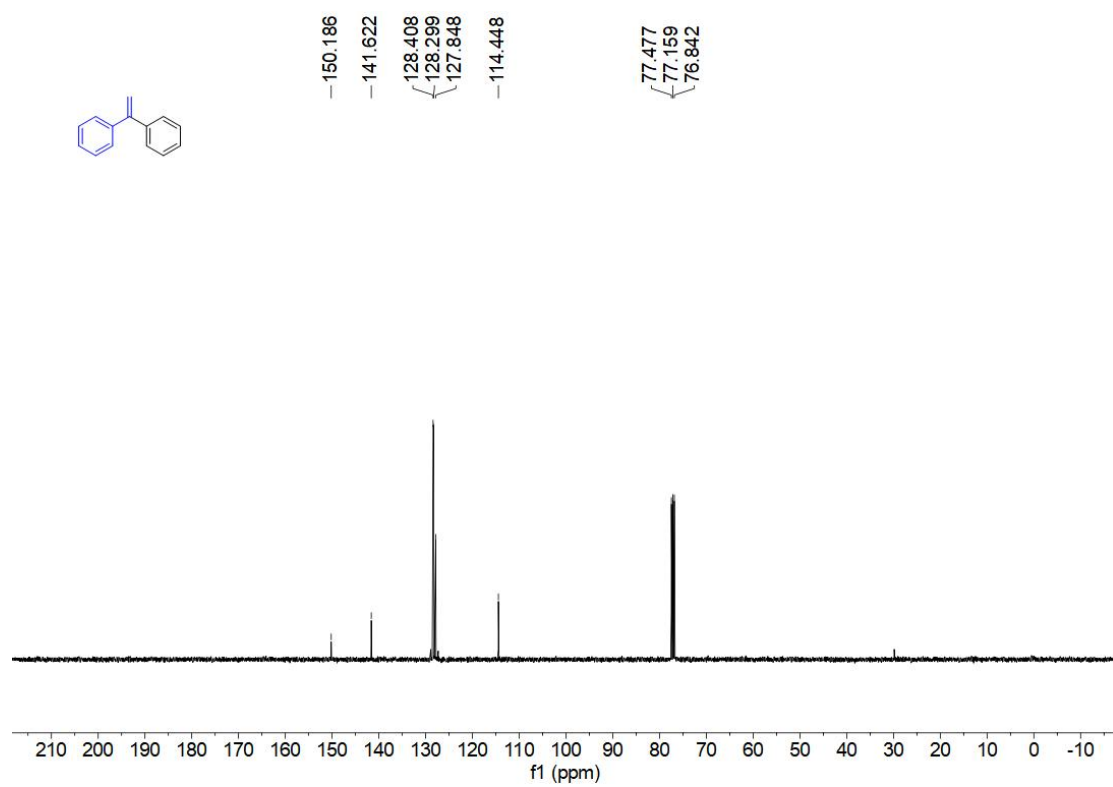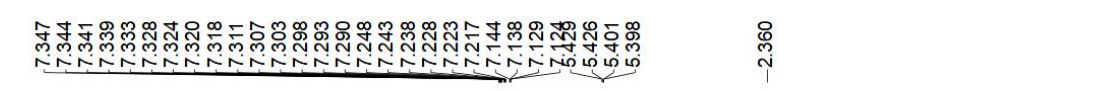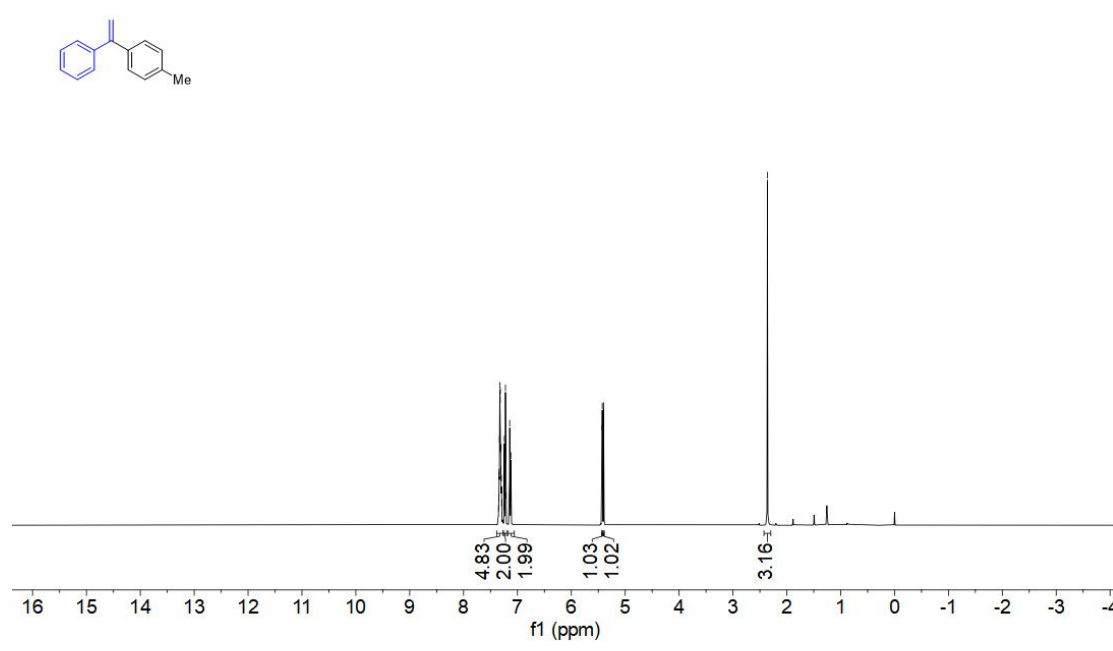



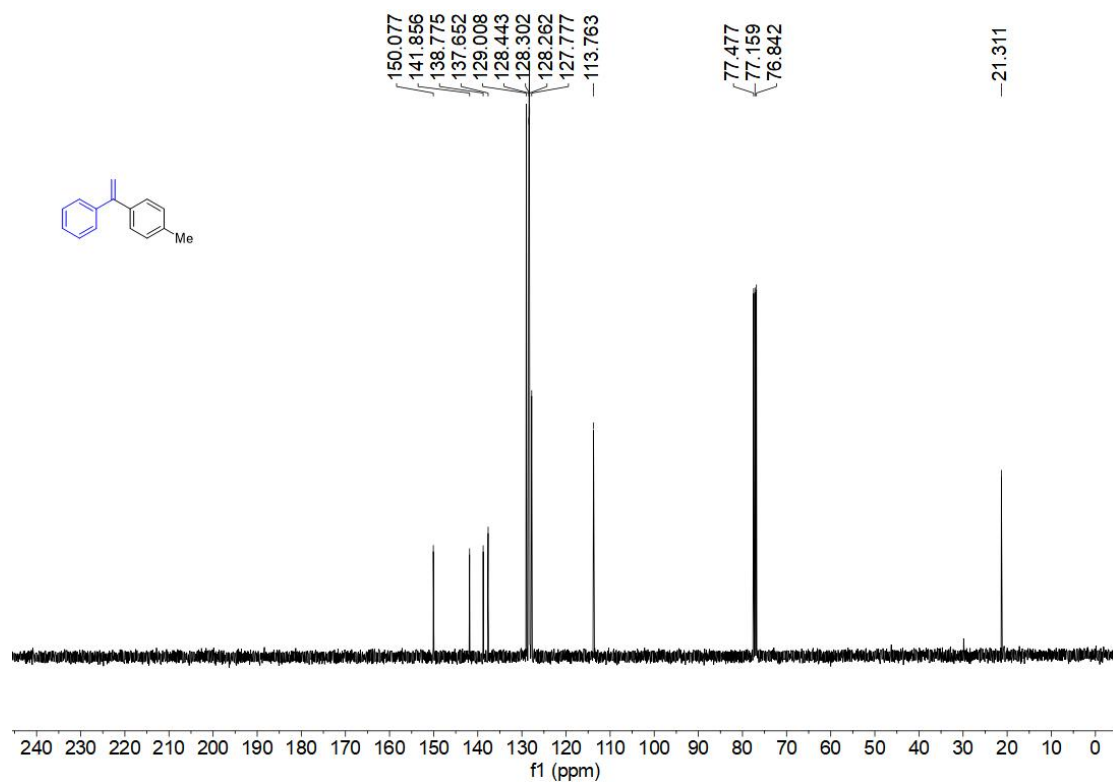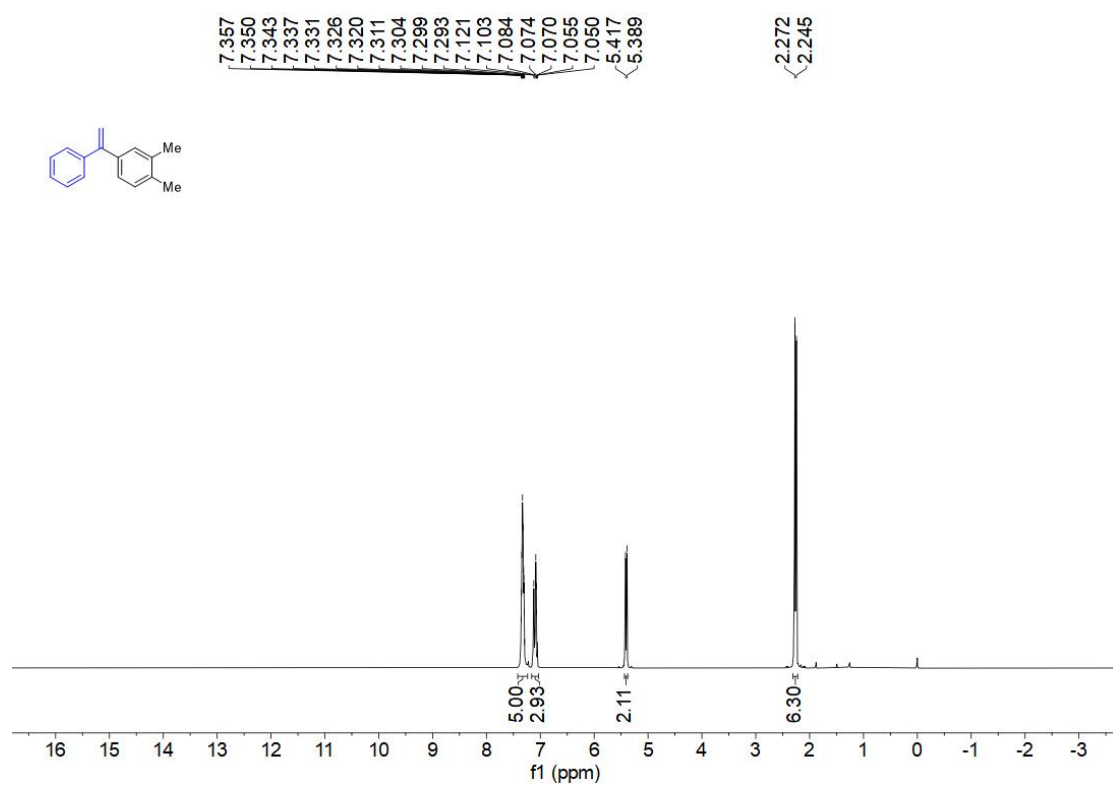

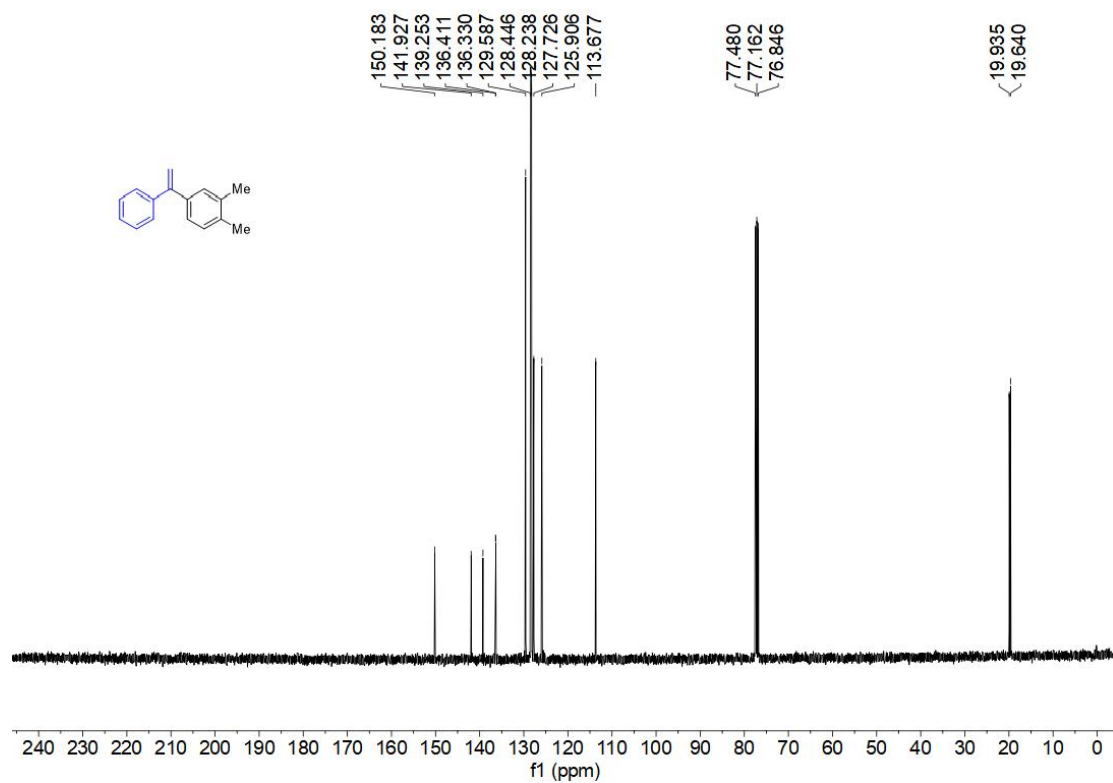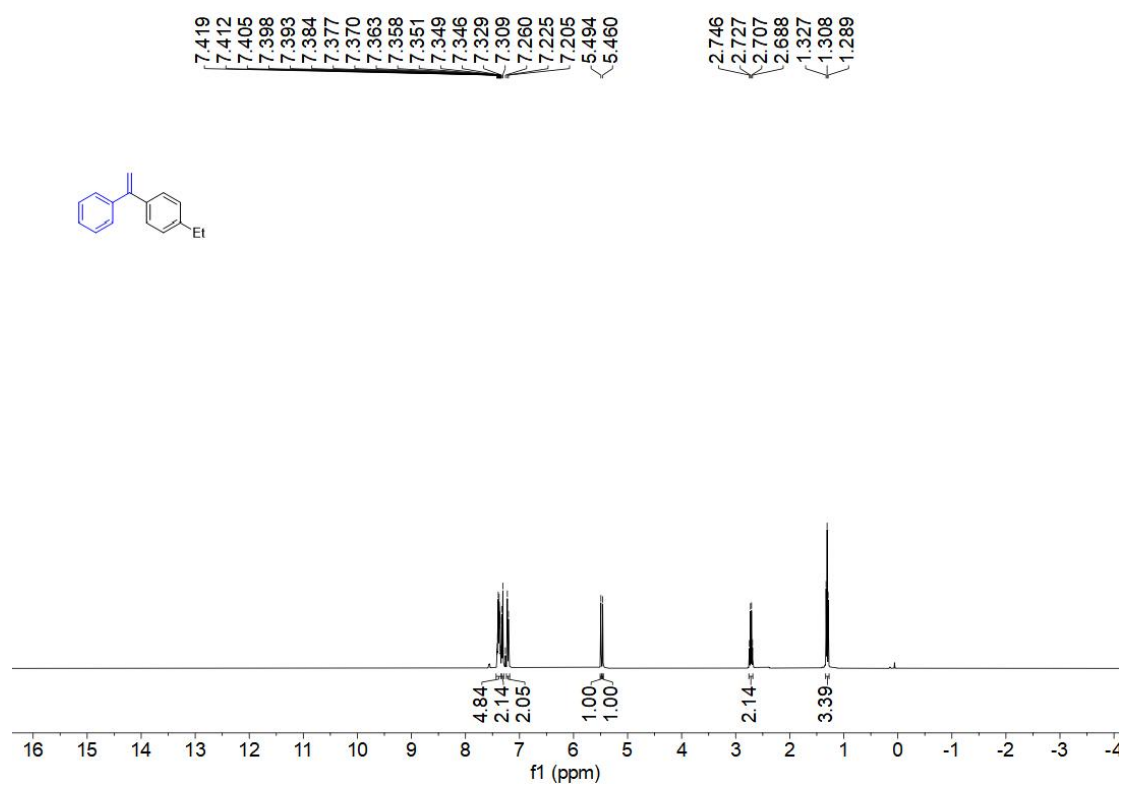

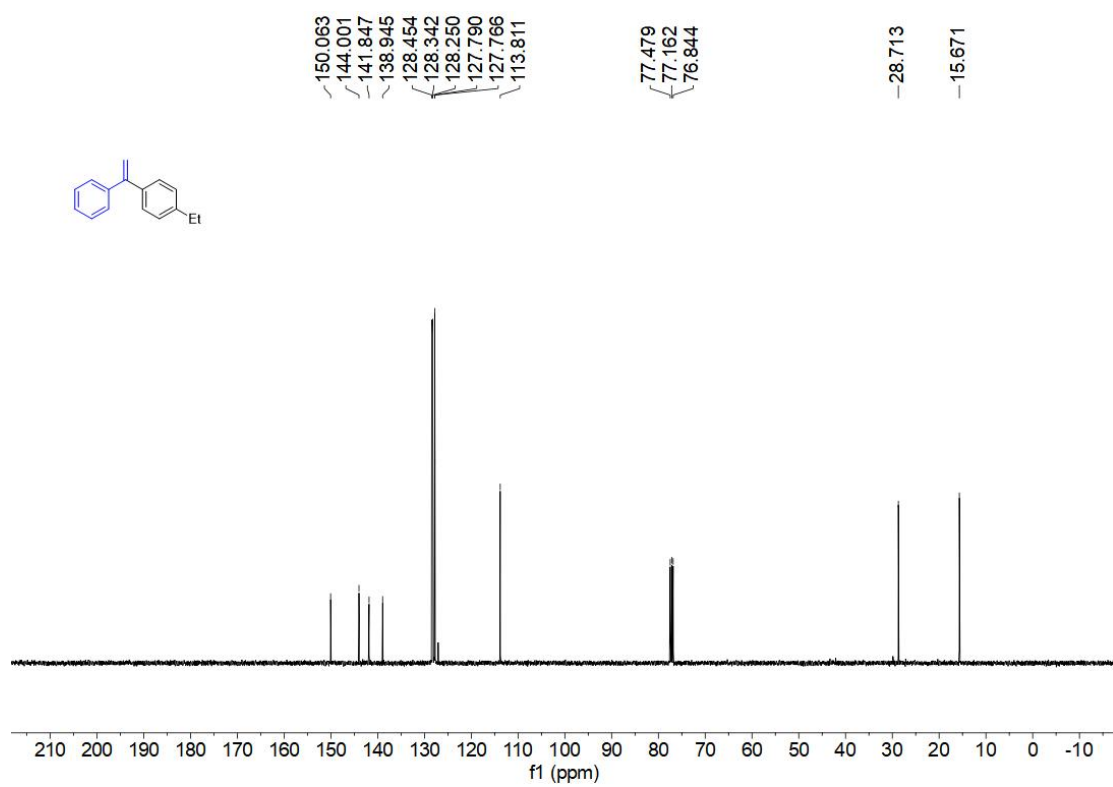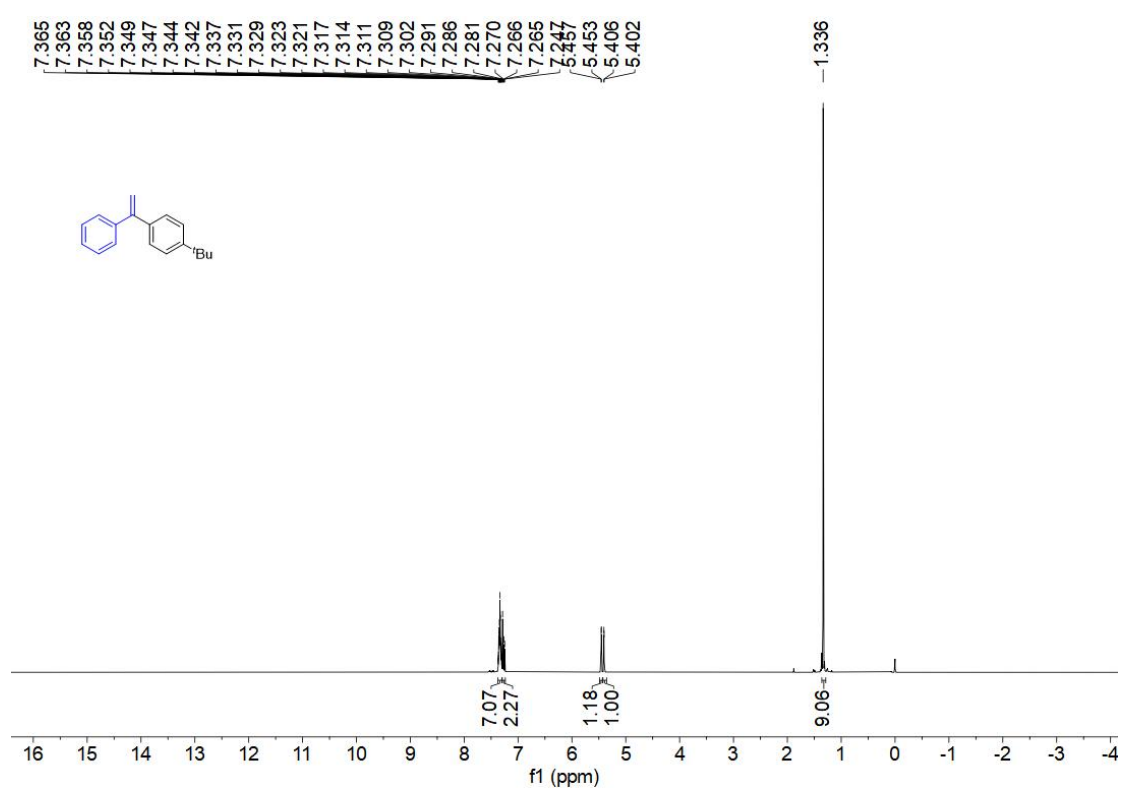

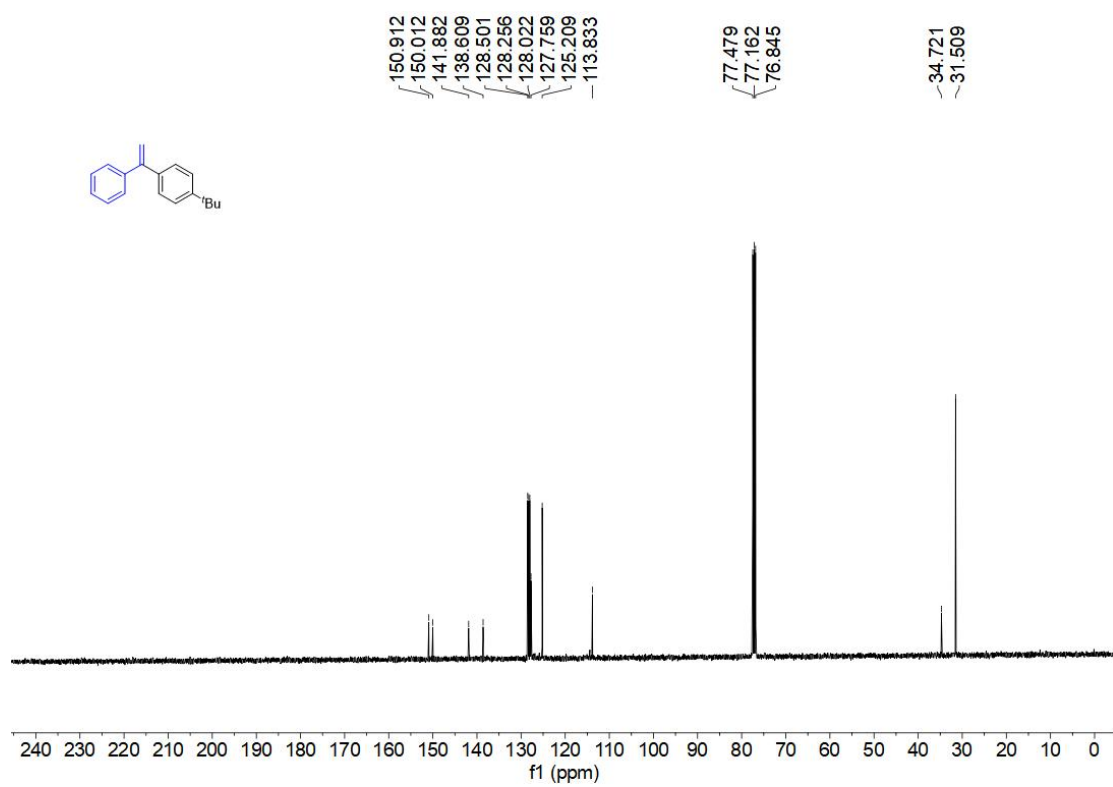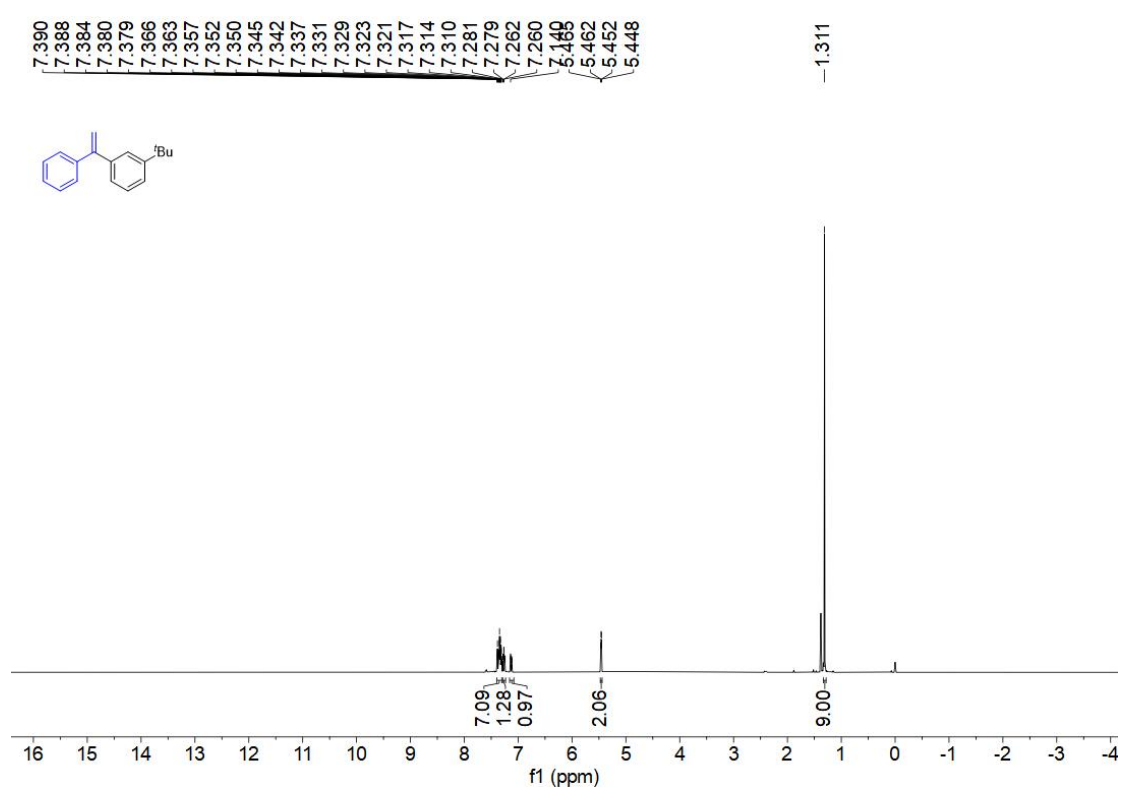

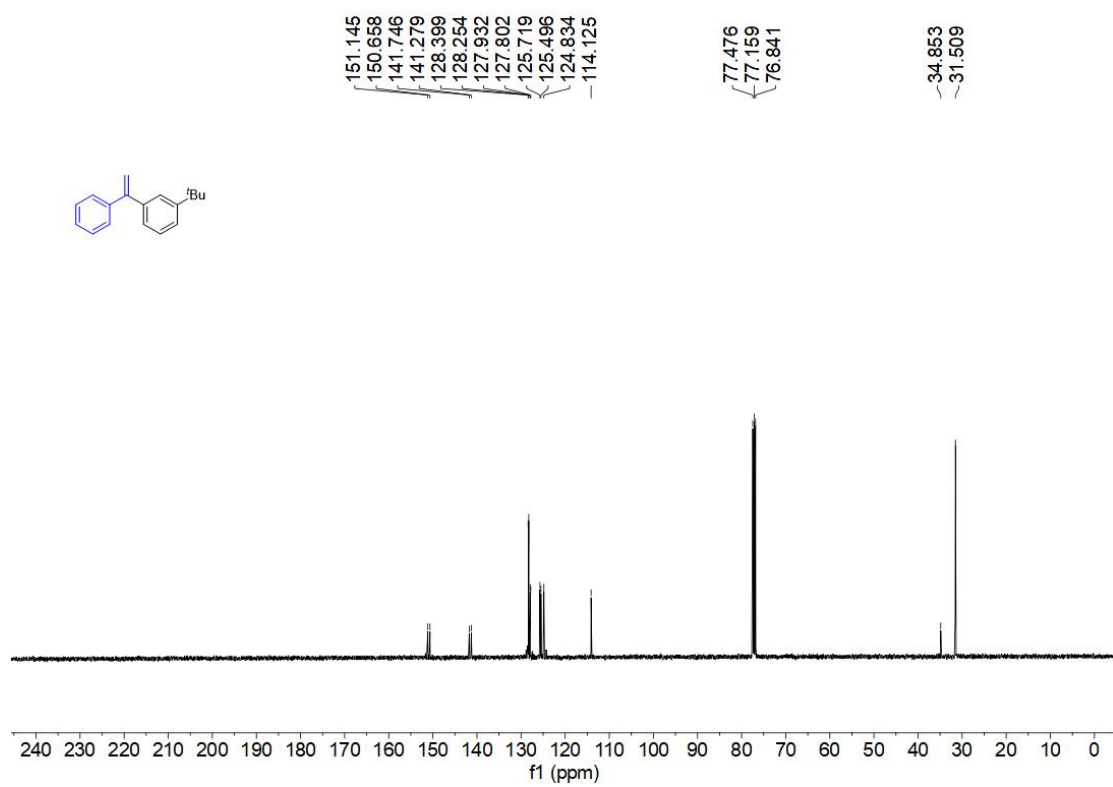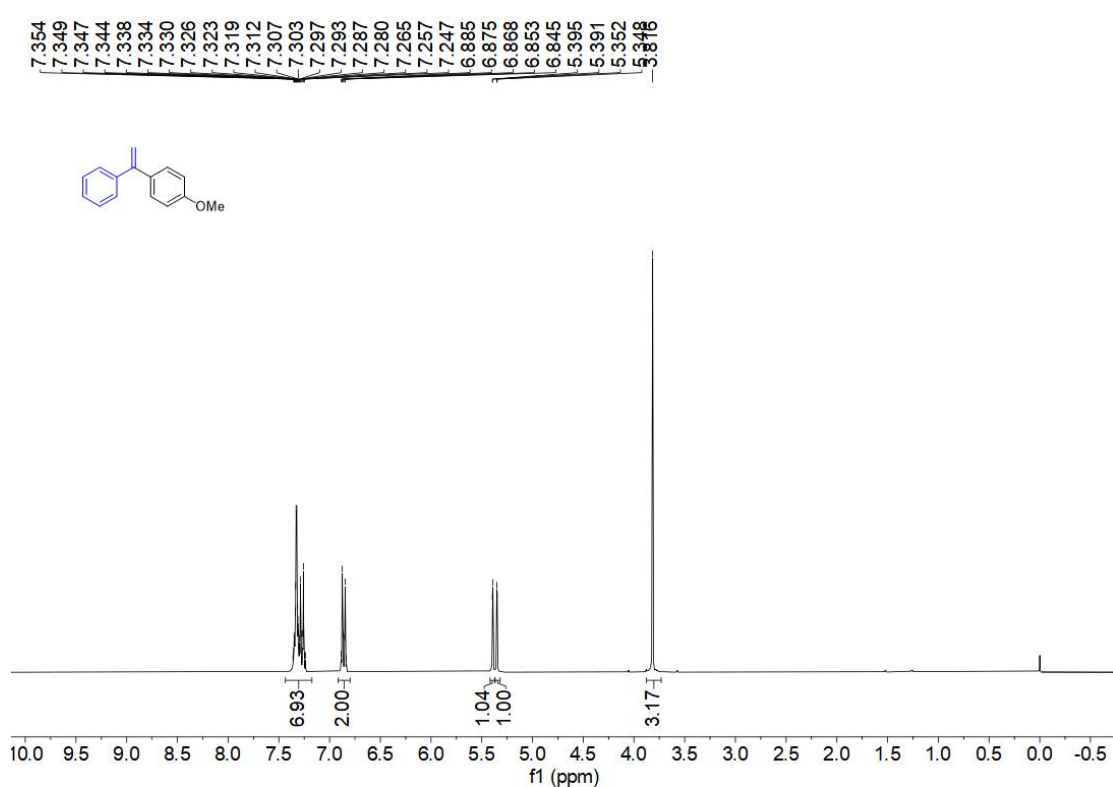

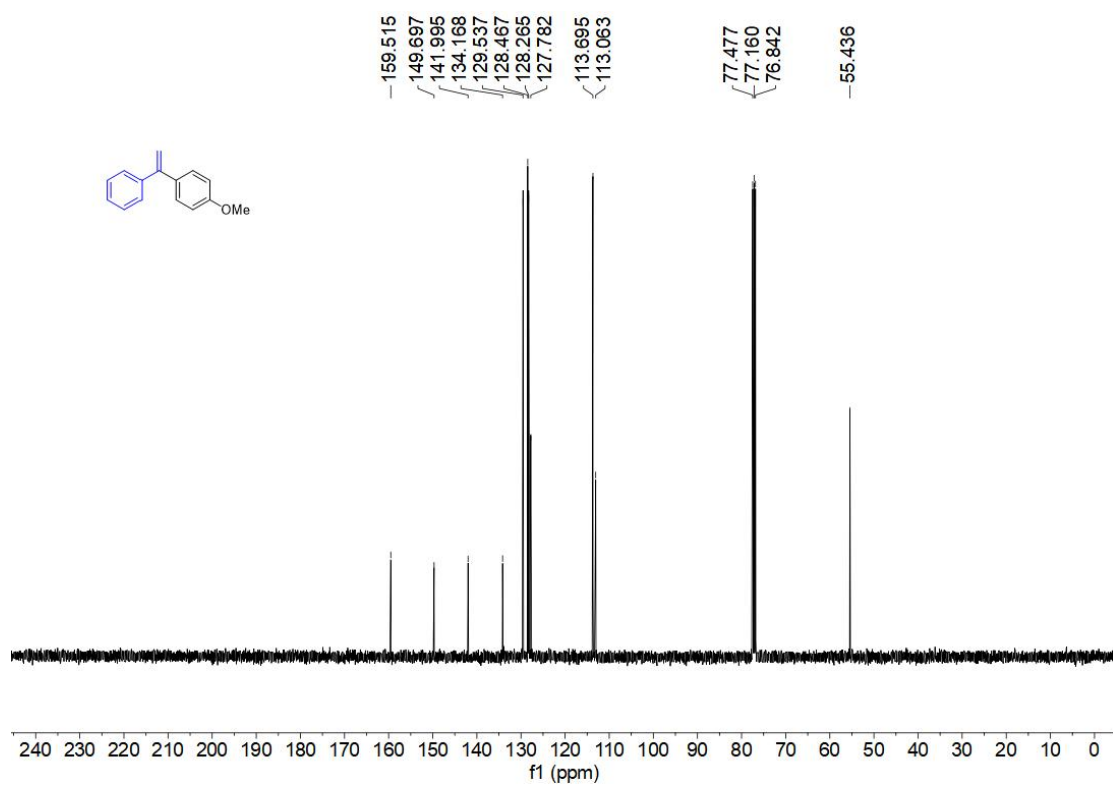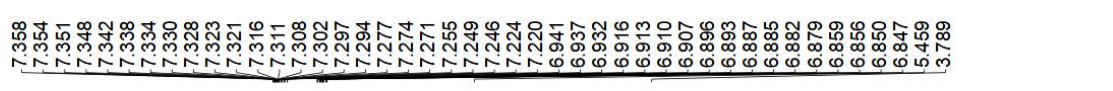

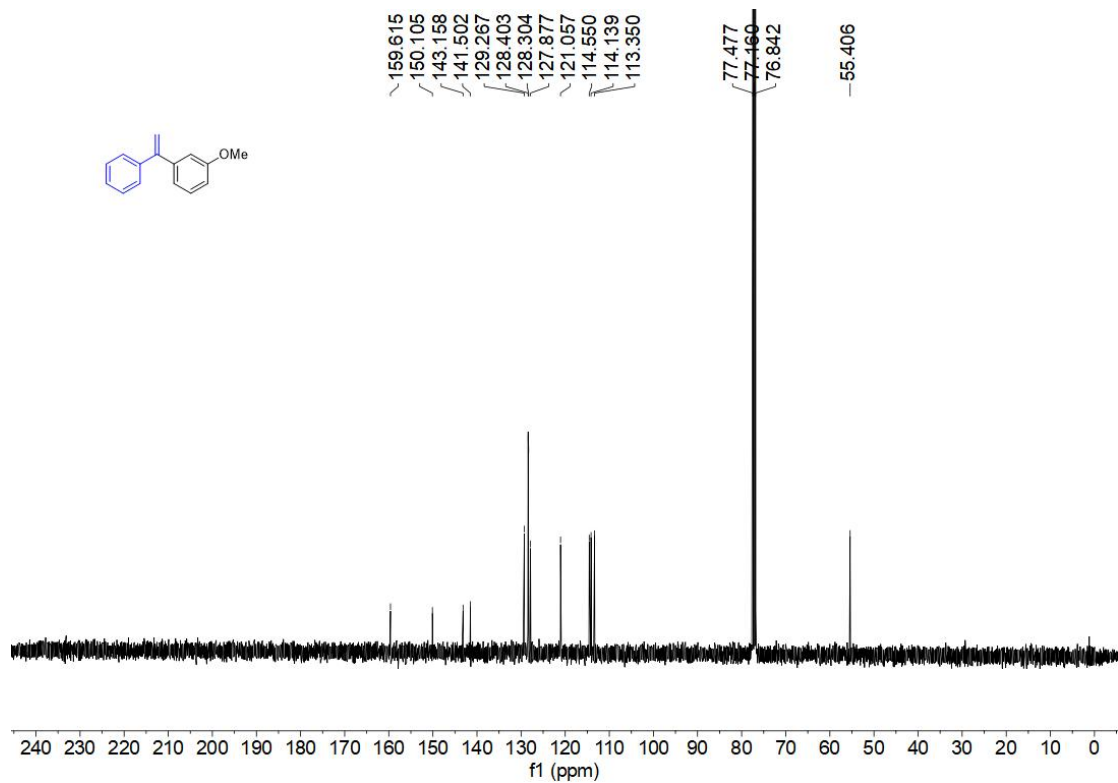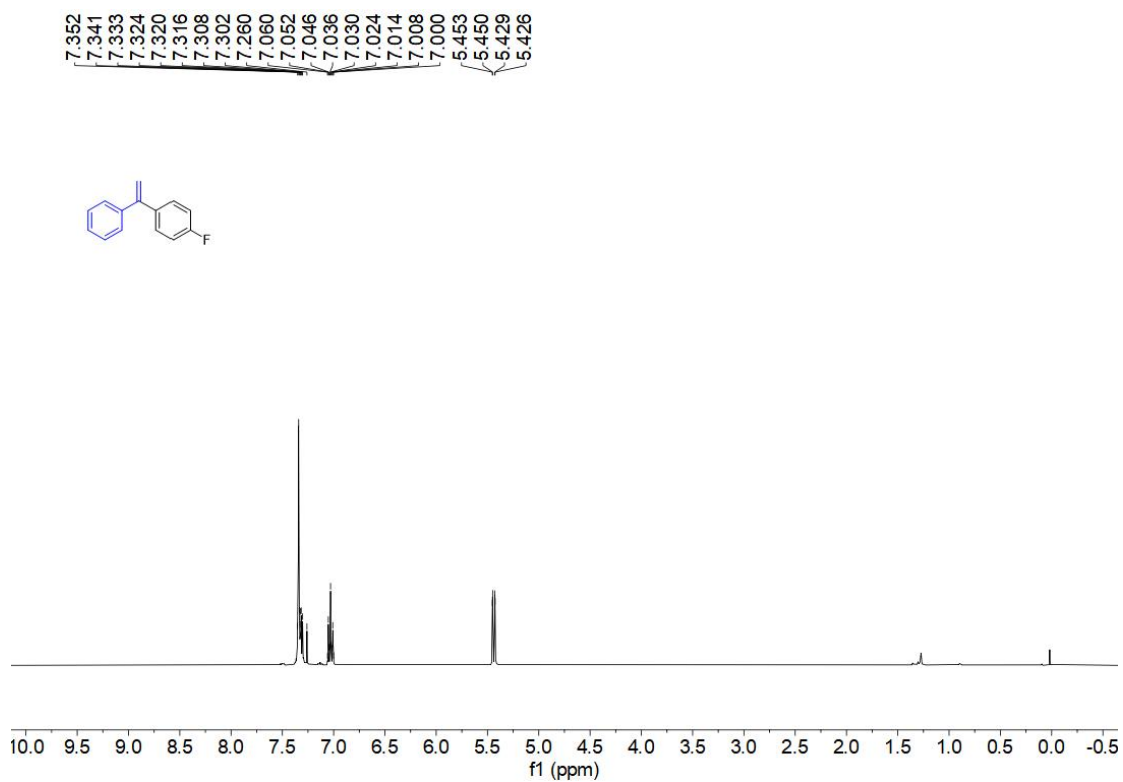

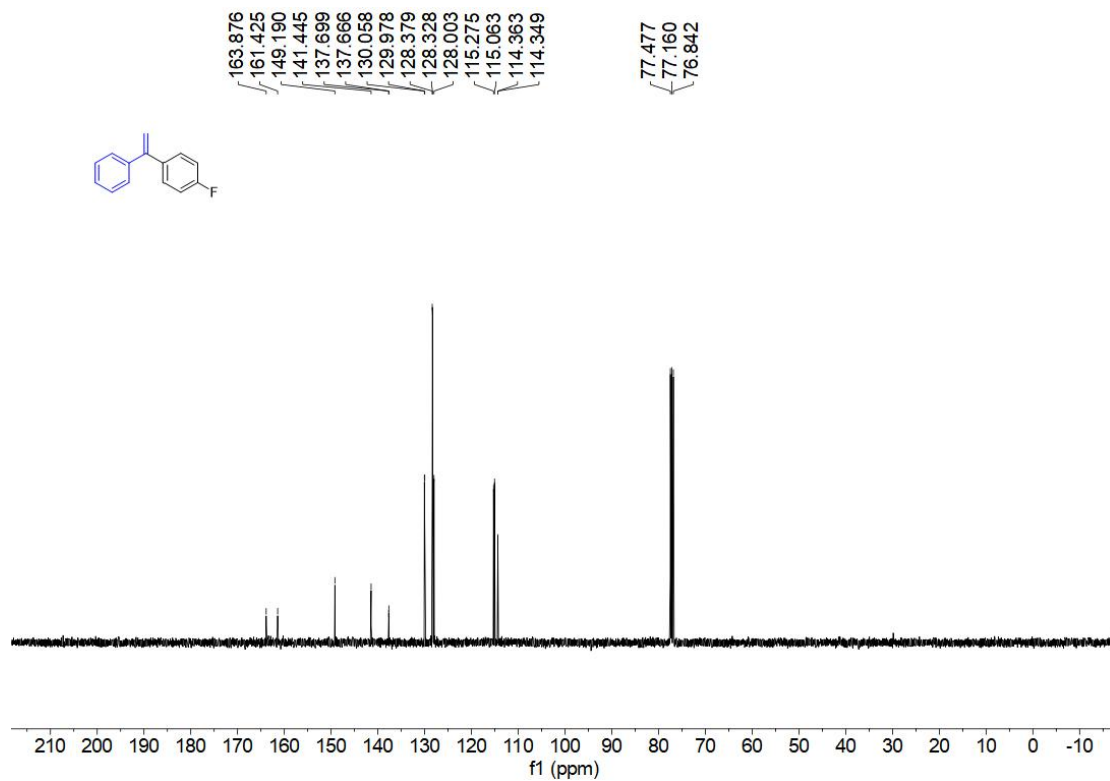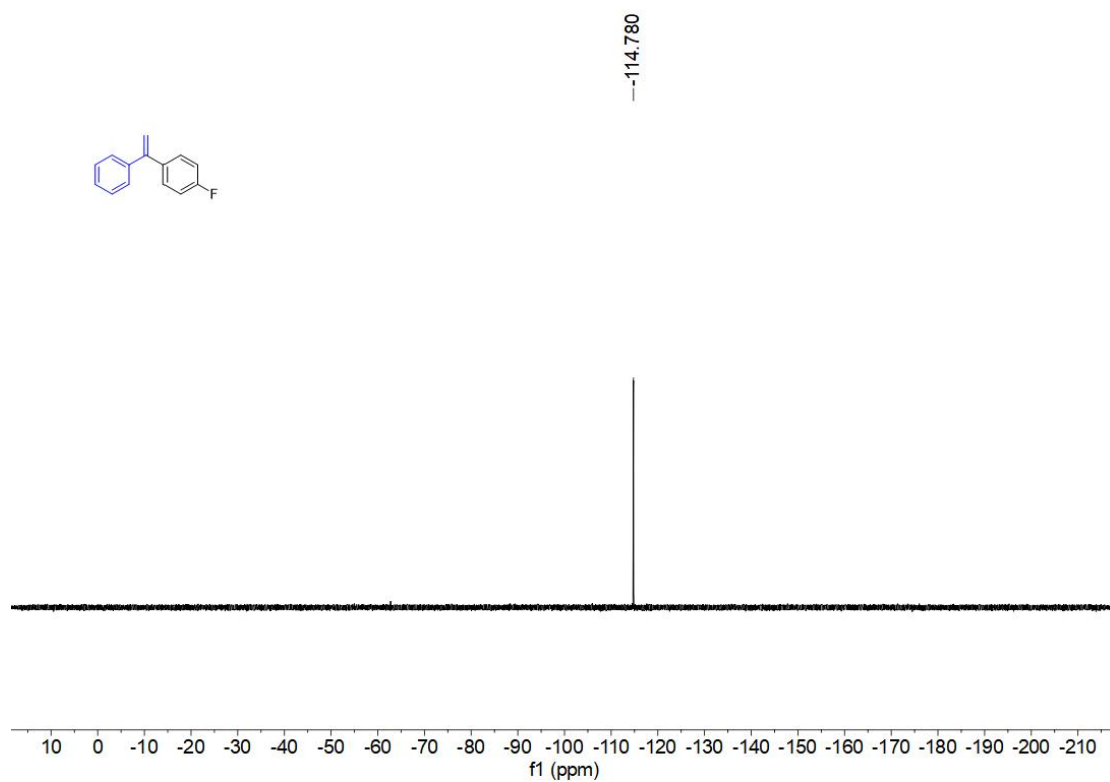



7.720  
7.717  
7.712  
7.703  
7.699  
7.697  
7.676  
7.670  
7.665  
7.655  
7.650  
7.644  
7.546  
7.541  
7.532  
7.527  
7.522  
7.511  
7.507  
7.499  
7.494  
7.492  
7.488  
7.484  
7.479  
7.475  
7.467  
7.458  
7.453  
7.447  
7.445  
7.440  
7.436  
7.431  
7.426  
7.417  
7.413  
7.260  
5.623  
5.573  
5.570

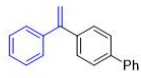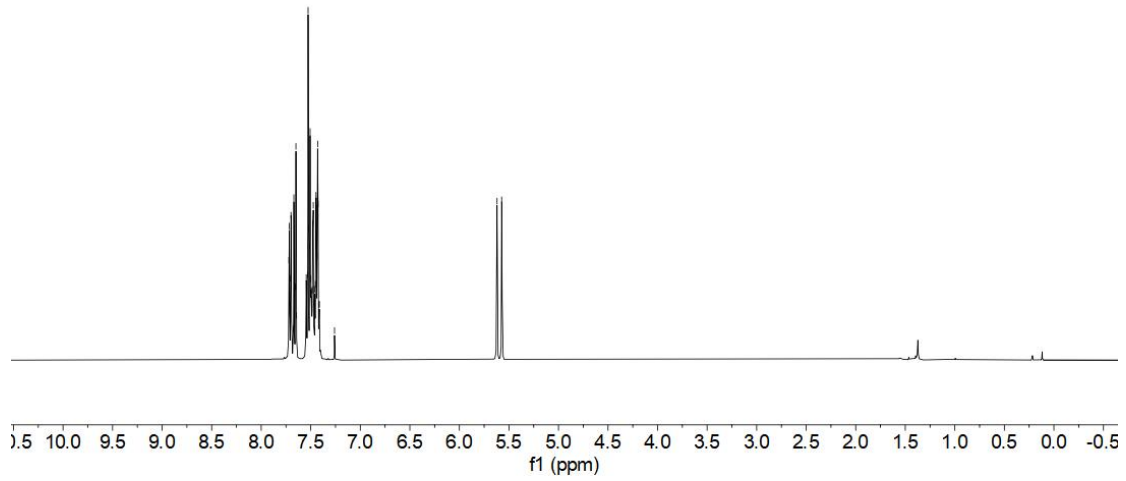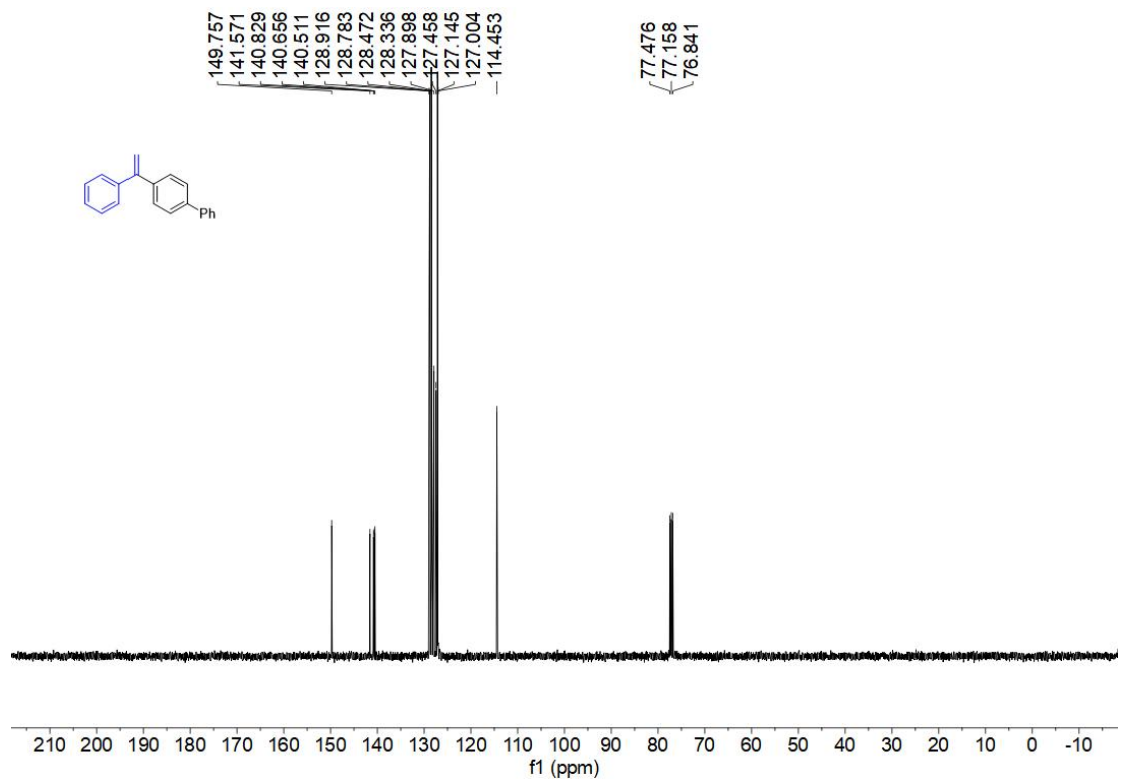

7.872  
7.865  
7.861  
7.860  
7.857  
7.853  
7.846  
7.837  
7.828  
7.821  
7.819  
7.816  
7.814  
7.810  
7.805  
7.522  
7.509  
7.505  
7.503  
7.497  
7.491  
7.484  
7.477  
7.432  
7.427  
7.425  
7.422  
7.416  
7.412  
7.406  
7.404  
7.401  
7.397  
7.394  
7.390  
7.388  
7.384  
7.378  
7.374  
7.369  
7.368  
7.365  
7.260  
5.624  
5.622  
5.583  
5.580

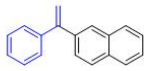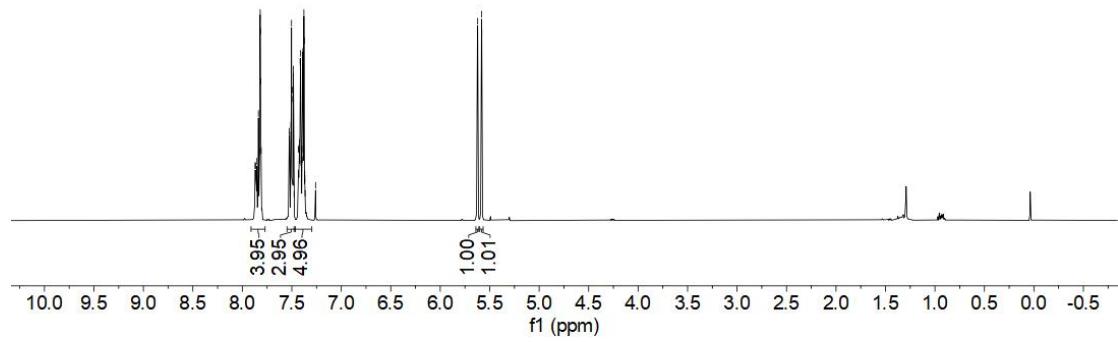

150.151  
141.626  
139.003  
133.414  
133.086  
128.510  
128.366  
128.310  
127.931  
127.825  
127.719  
127.415  
126.527  
126.284  
126.144  
114.984

77.476  
77.159  
76.841

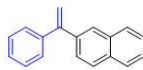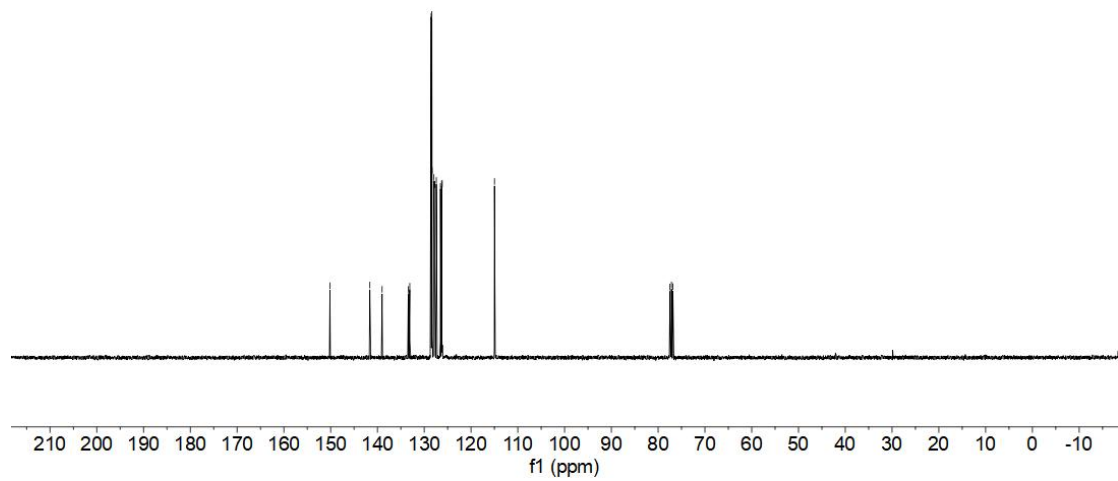

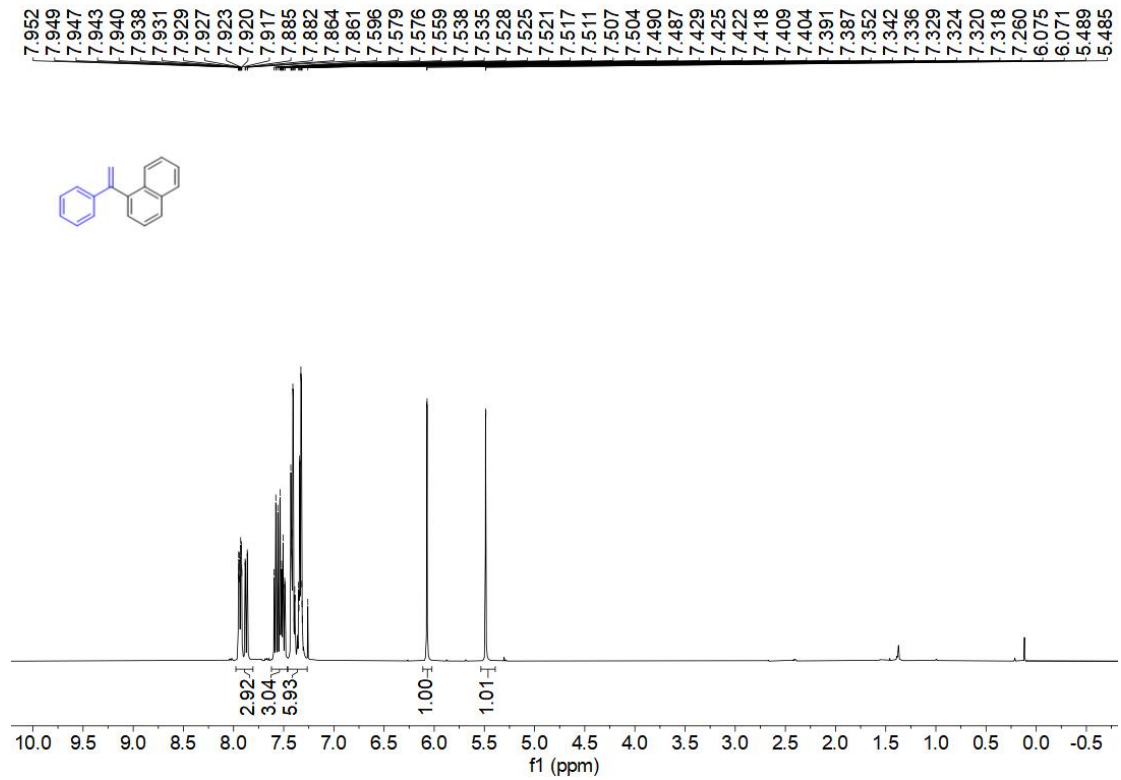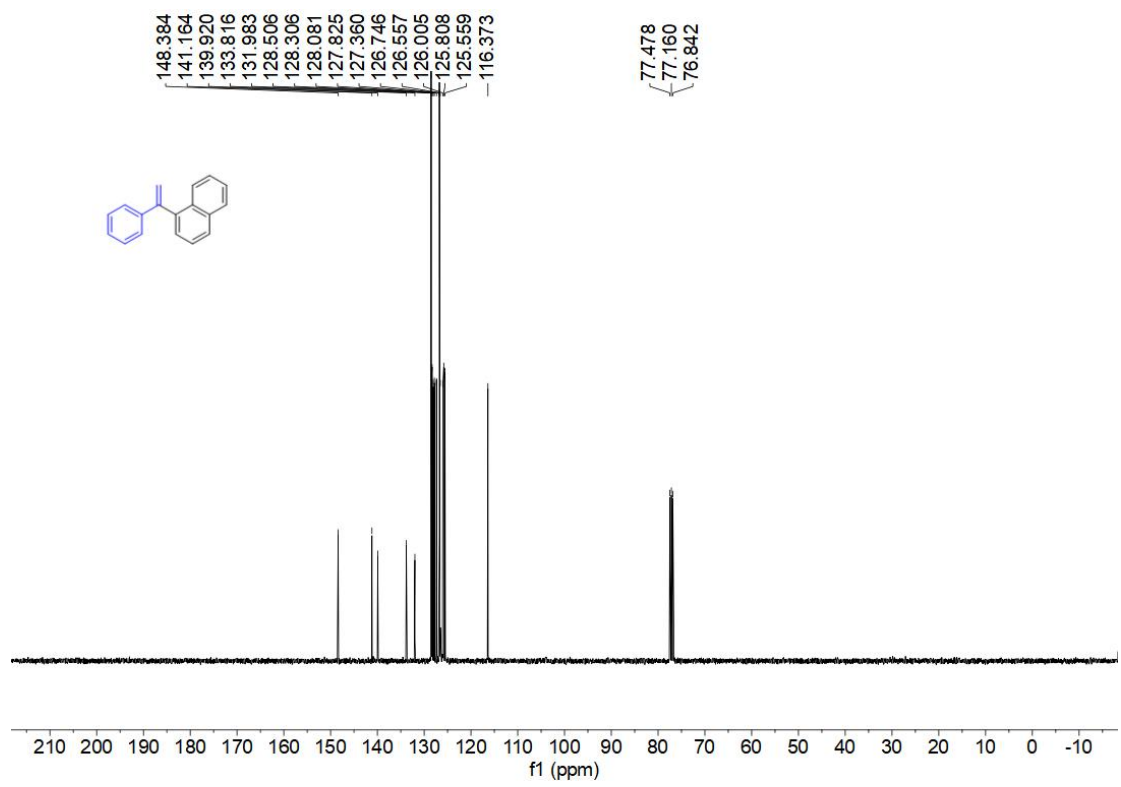

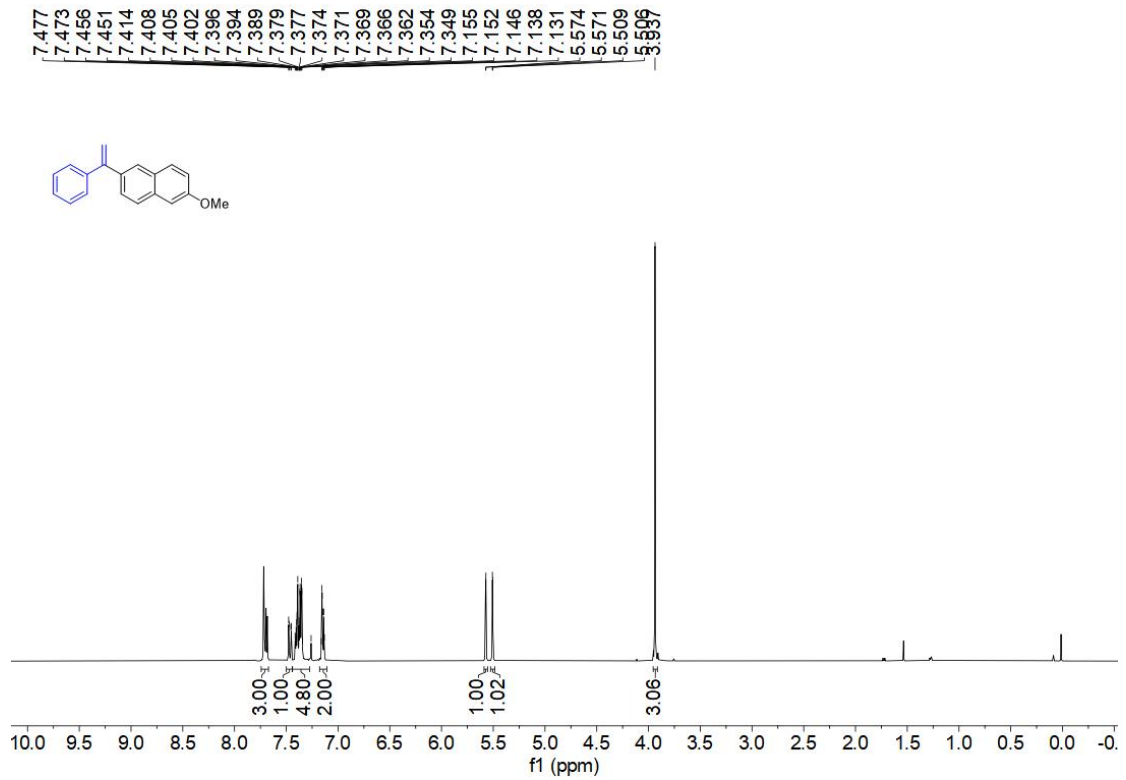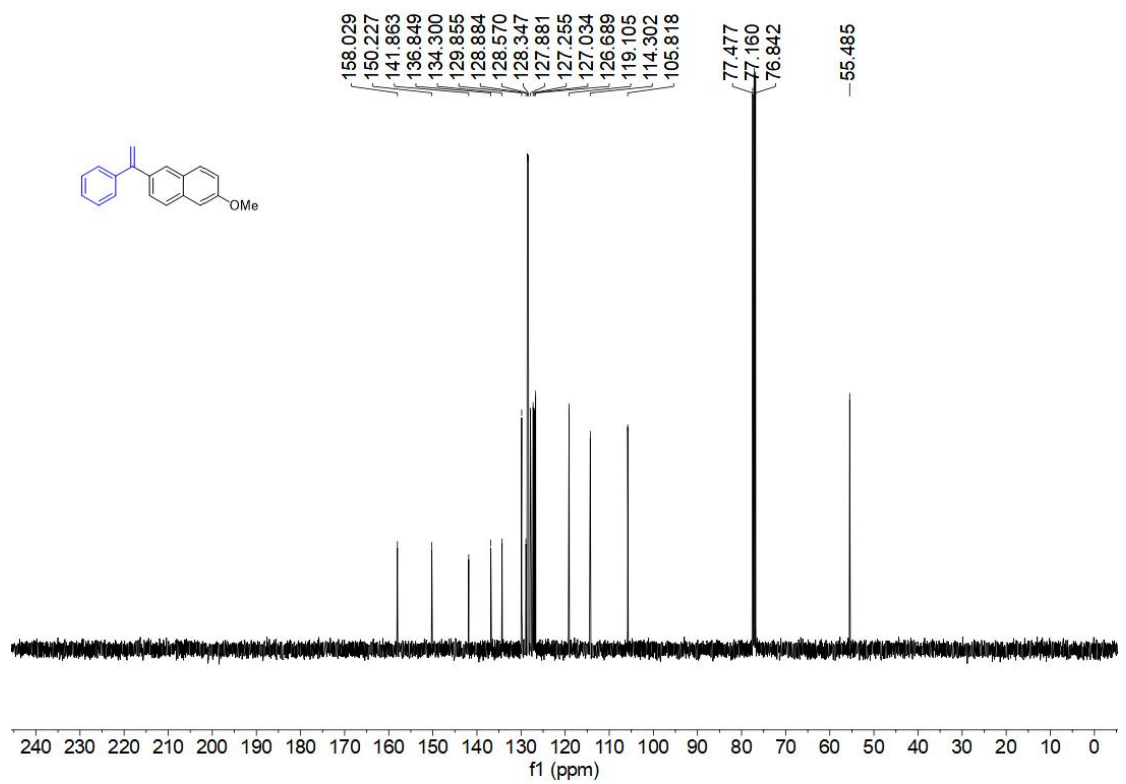

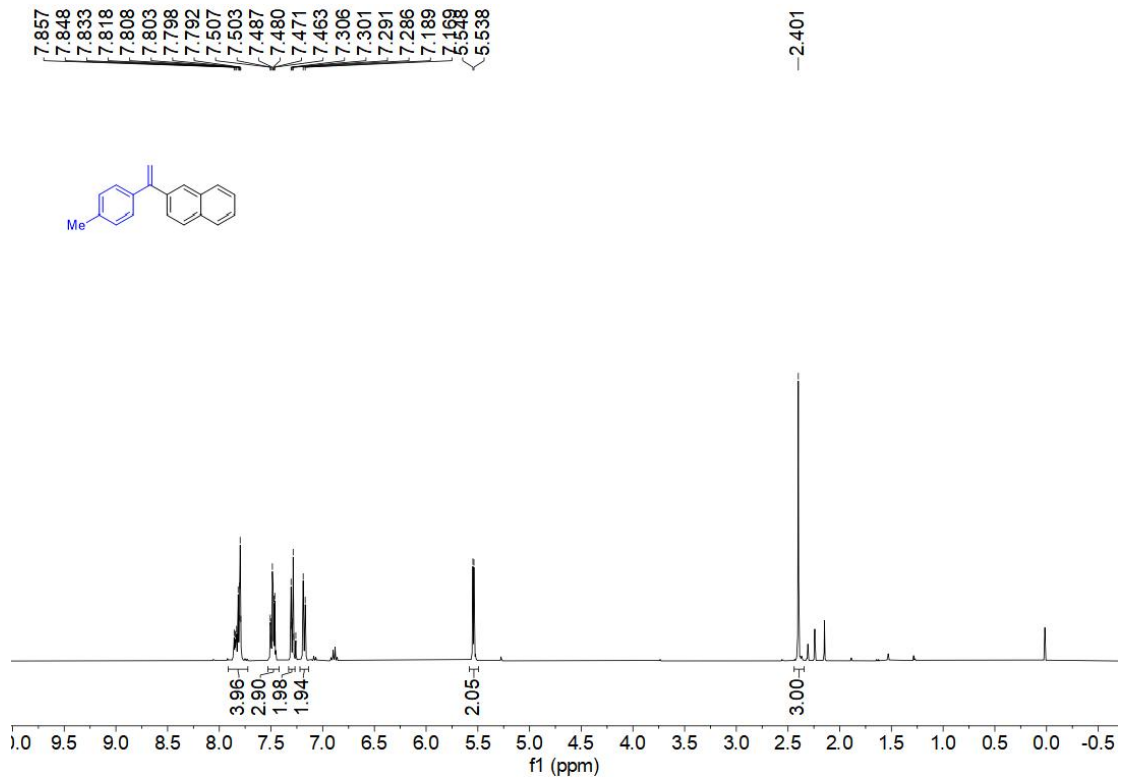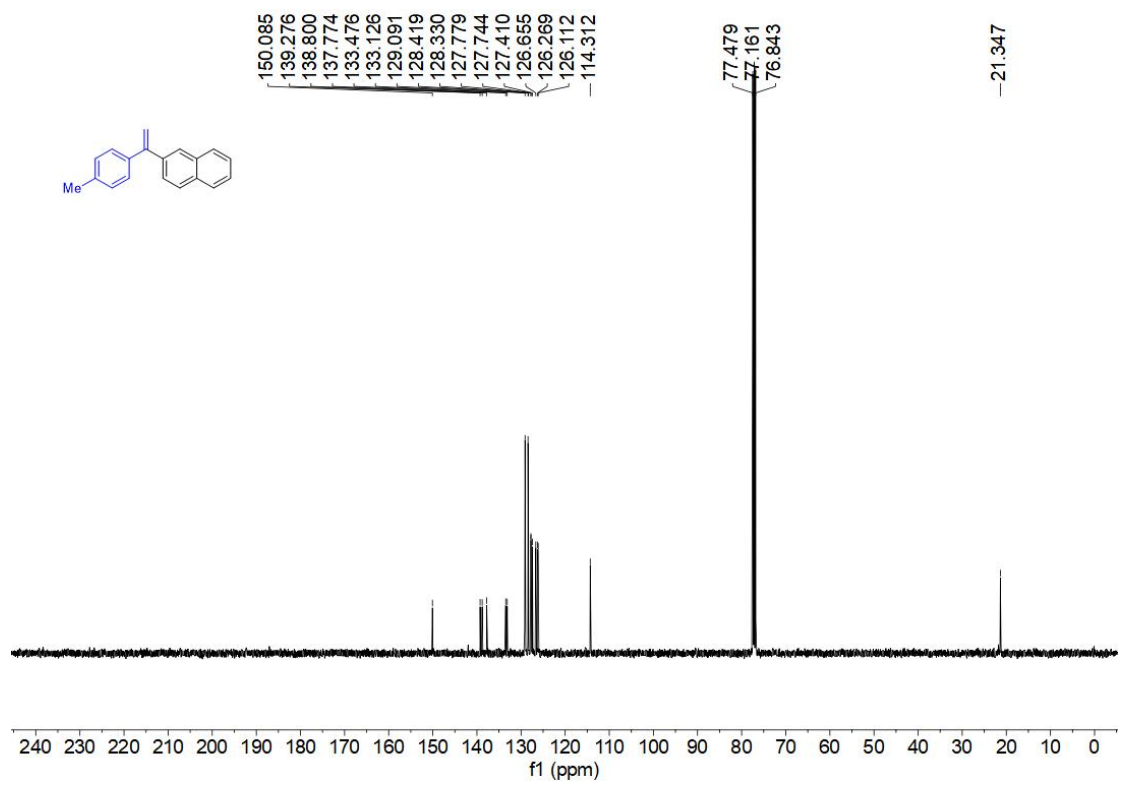

7.860  
7.849  
7.840  
7.827  
7.816  
7.804  
7.797  
7.784  
7.764  
7.758  
7.509  
7.497  
7.486  
7.480  
7.476  
7.465  
7.452  
7.446  
7.381  
7.373  
7.362  
7.352  
7.341  
7.333  
7.323  
7.260  
7.076  
7.069  
7.054  
7.047  
7.039  
7.025  
7.018  
5.576  
5.573  
5.510  
5.506

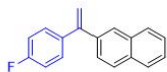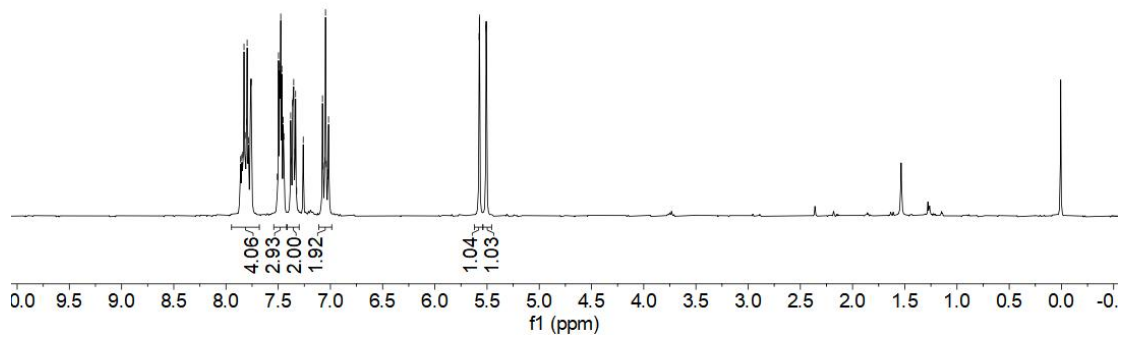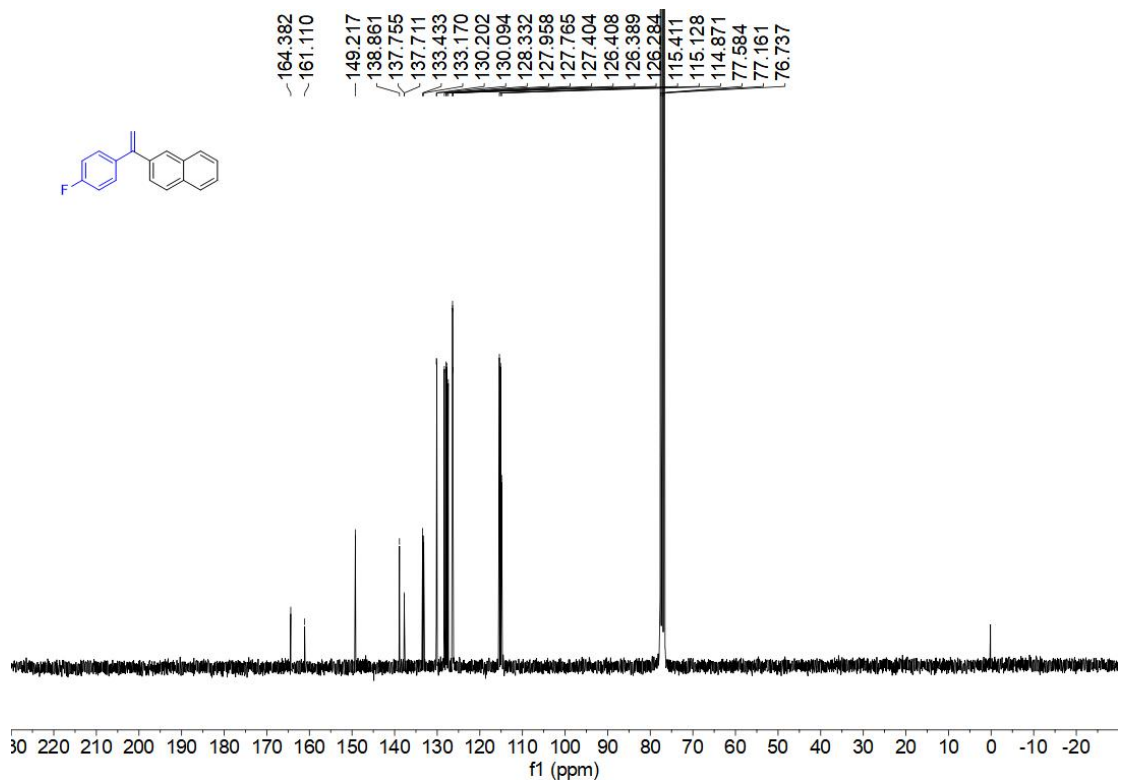

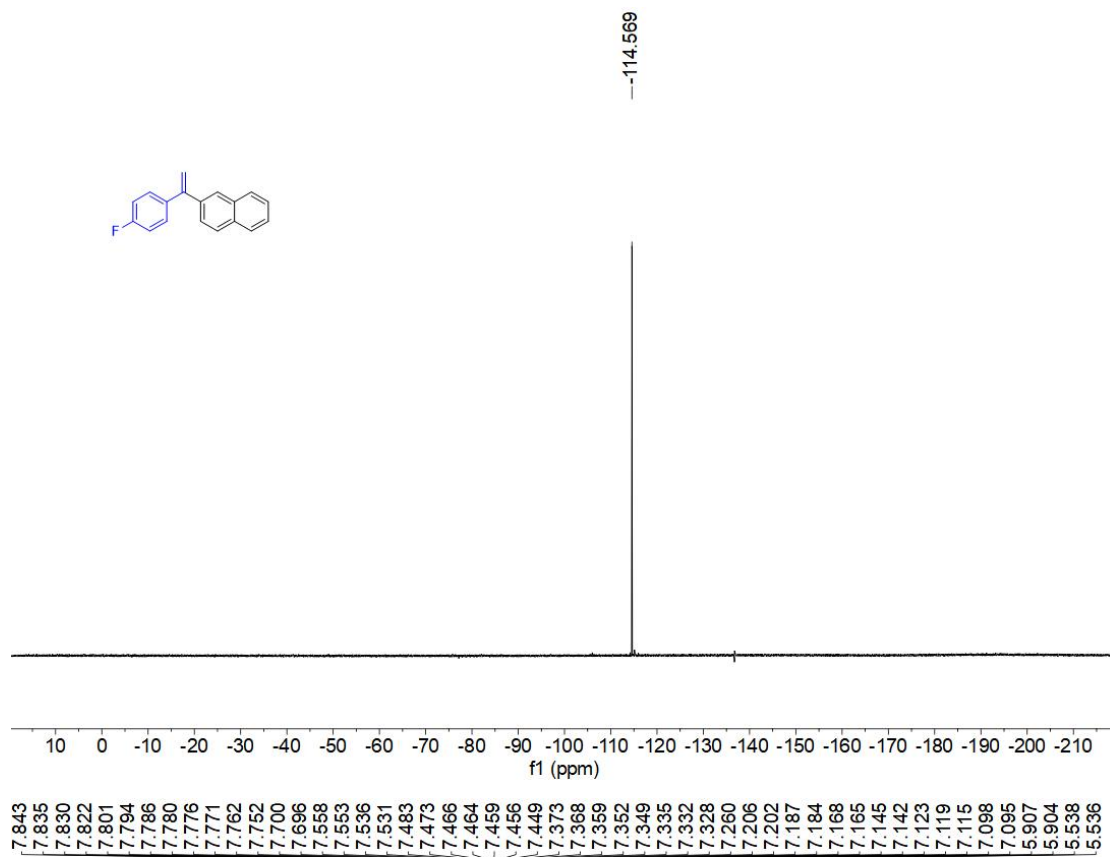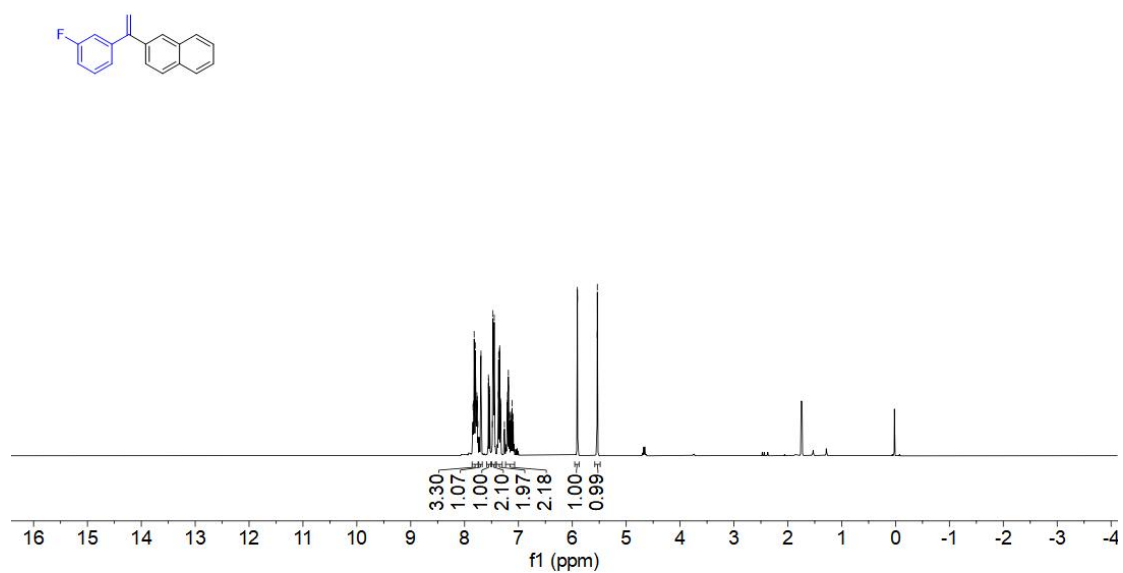

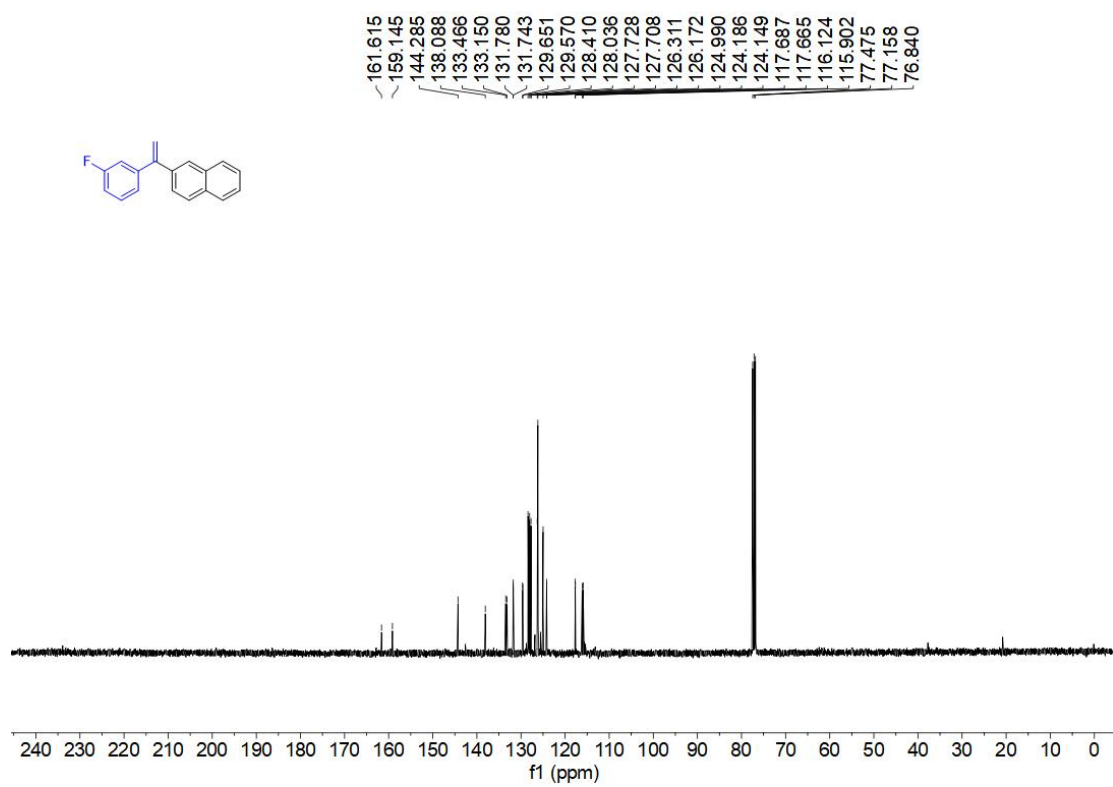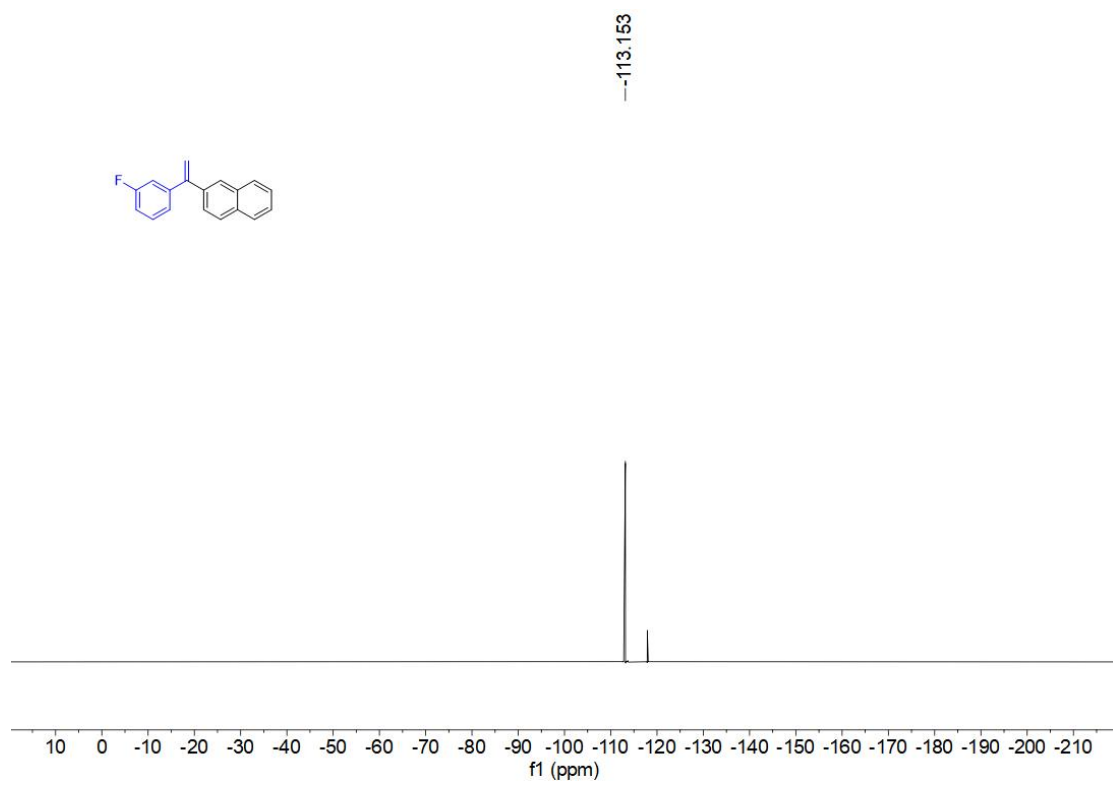



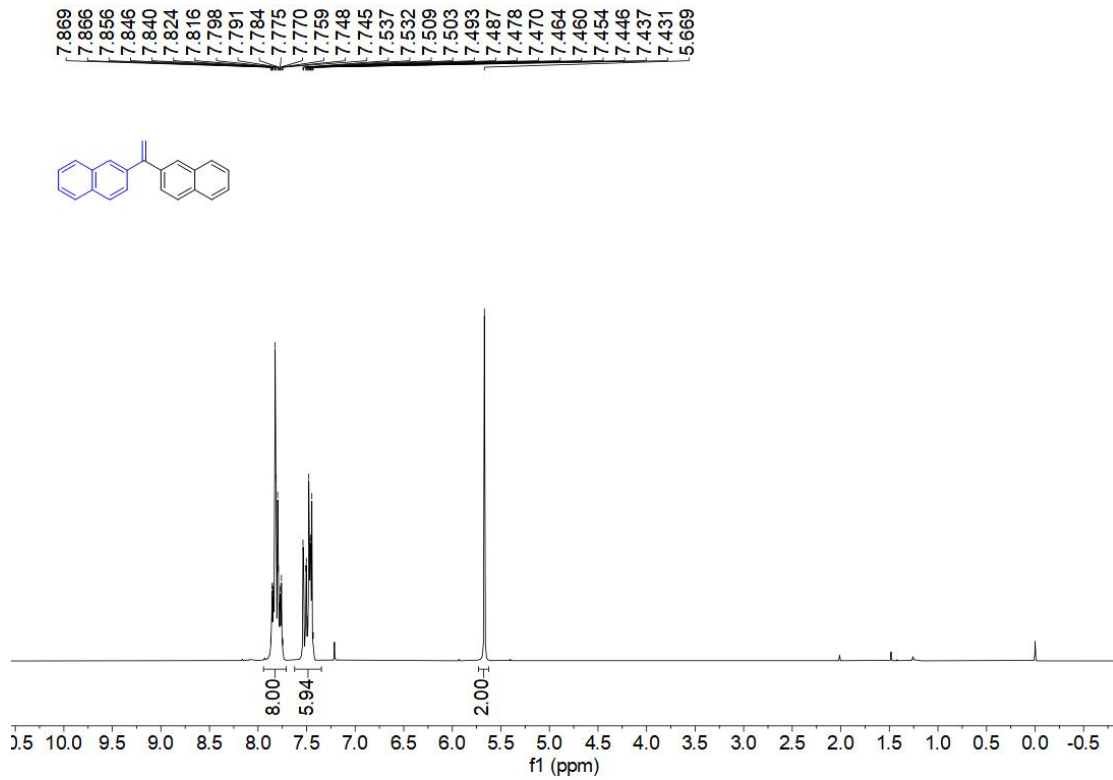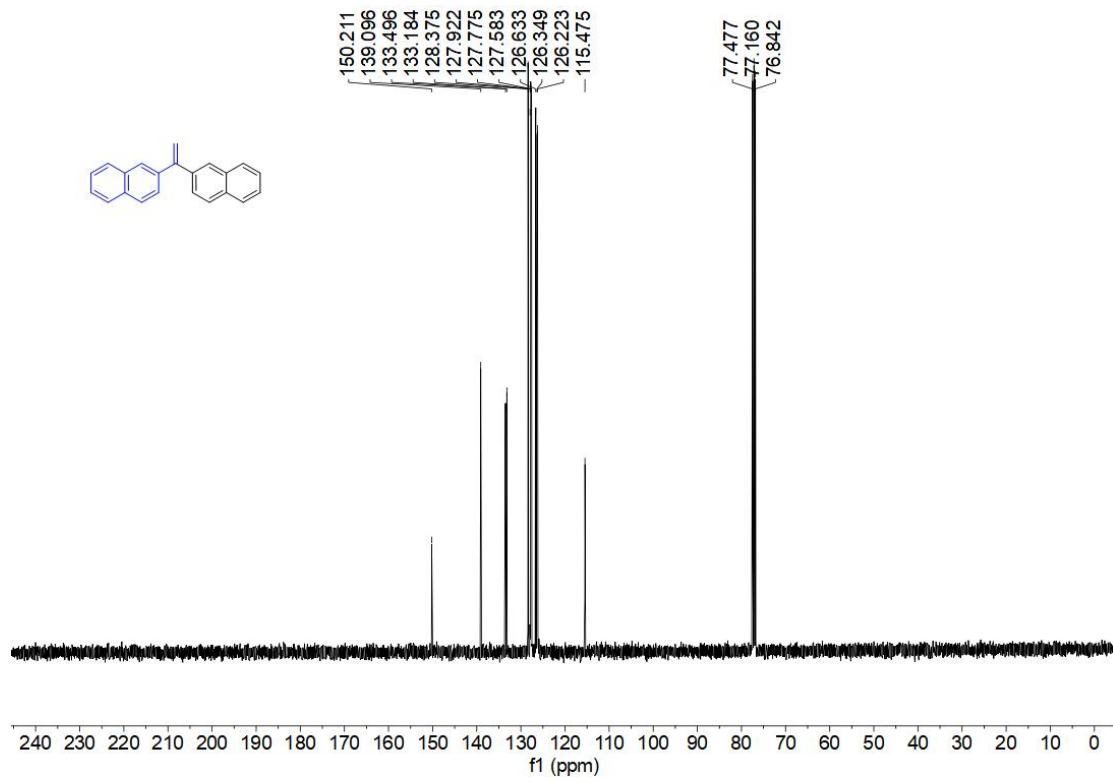

7.962  
7.958  
7.900  
7.889  
7.885  
7.876  
7.868  
7.861  
7.852  
7.822  
7.816  
7.812  
7.803  
7.799  
7.797  
7.658  
7.652  
7.645  
7.641  
7.635  
7.613  
7.609  
7.592  
7.588  
7.540  
7.531  
7.523  
7.515  
7.507  
7.498  
7.346  
7.340  
7.334  
7.332  
7.328  
7.323  
7.320  
7.315  
7.310  
7.302  
7.297  
7.260  
7.115  
5.799  
5.511

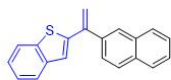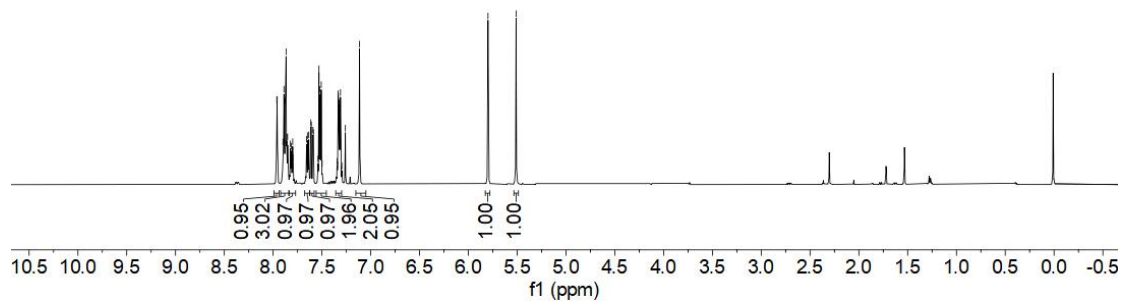

144.896  
144.034  
140.302  
139.654  
138.143  
133.413  
133.334  
128.375  
127.995  
127.842  
127.629  
126.744  
126.481  
126.429  
124.925  
124.576  
123.906  
122.291  
116.514  
77.477  
77.160  
76.843

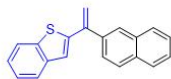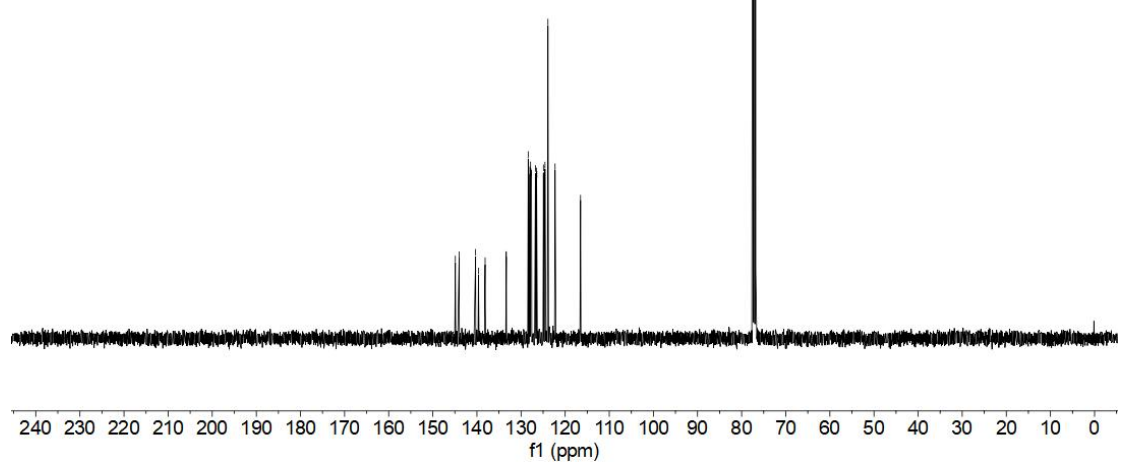

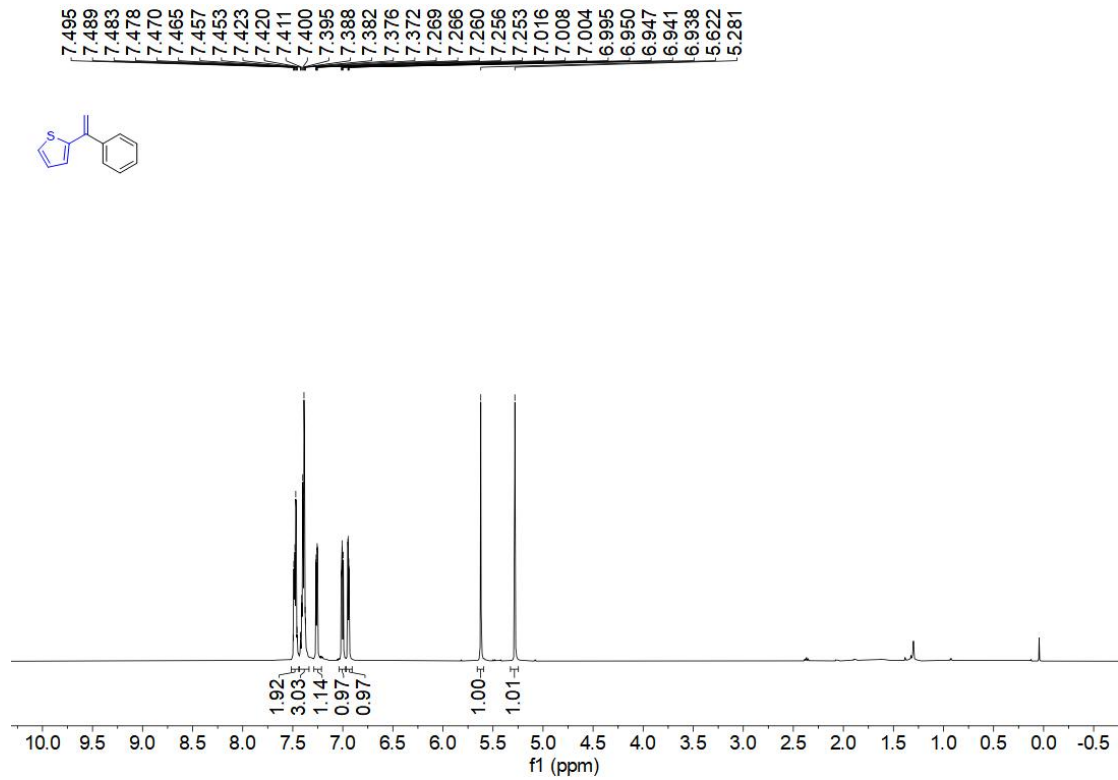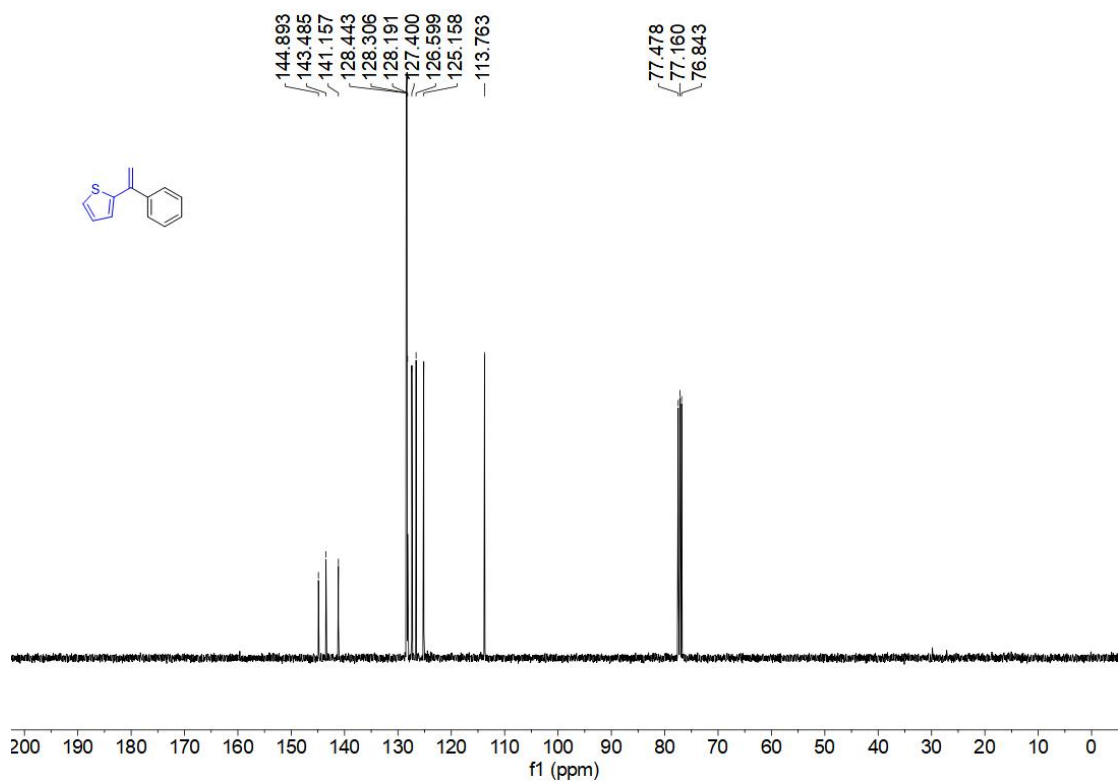

7.539  
7.532  
7.527  
7.520  
7.515  
7.512  
7.509  
7.463  
7.450  
7.442  
7.441  
7.436  
7.429  
7.424  
7.419  
7.416  
7.412  
7.339  
7.335  
7.320  
7.317  
7.314  
7.300  
7.296  
7.260  
7.243  
7.241  
7.224  
7.222  
7.206  
7.204  
6.564  
6.562  
6.079  
5.460  
5.457

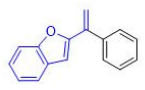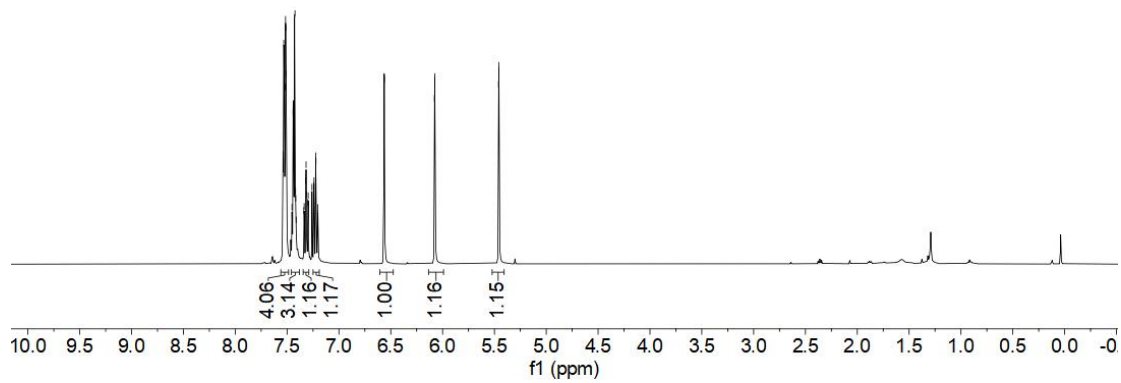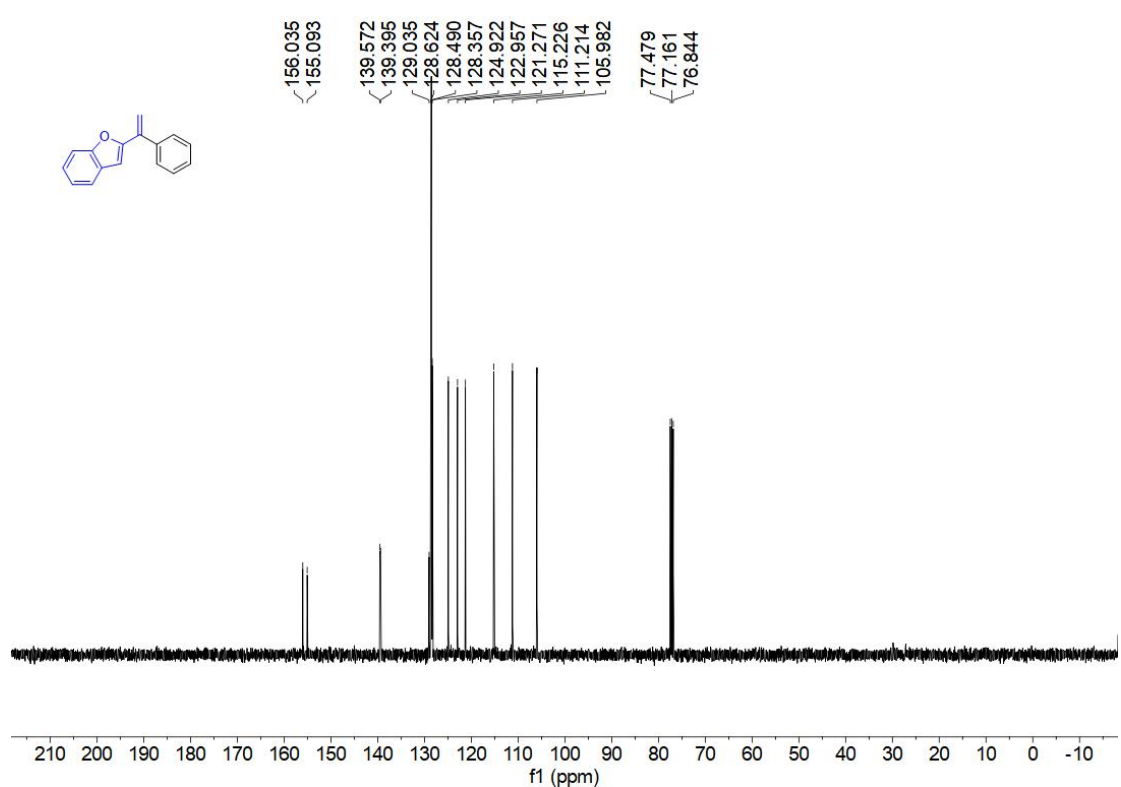

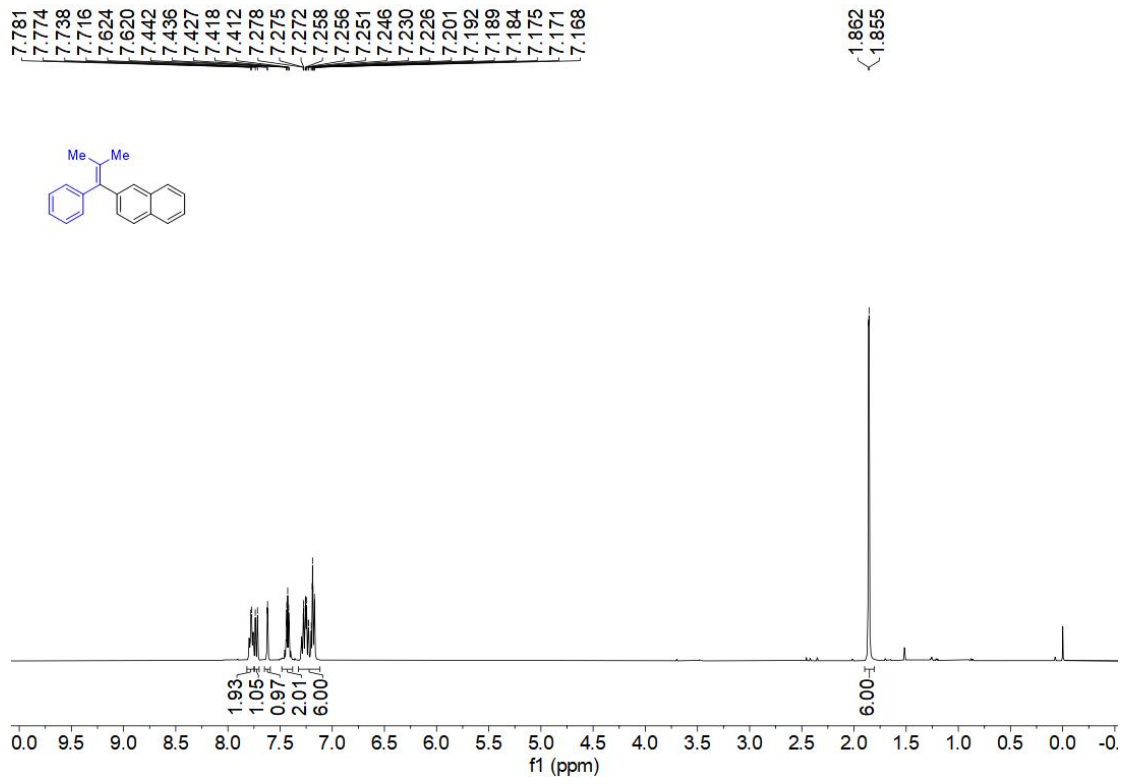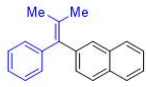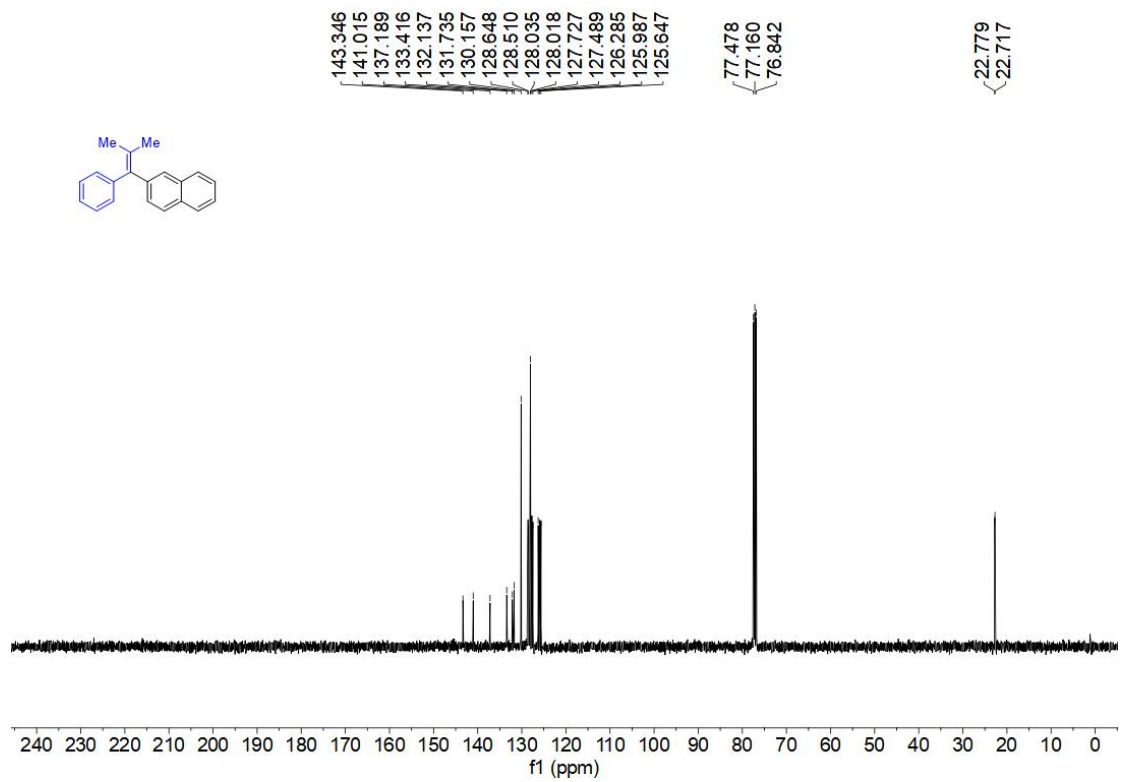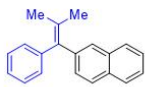

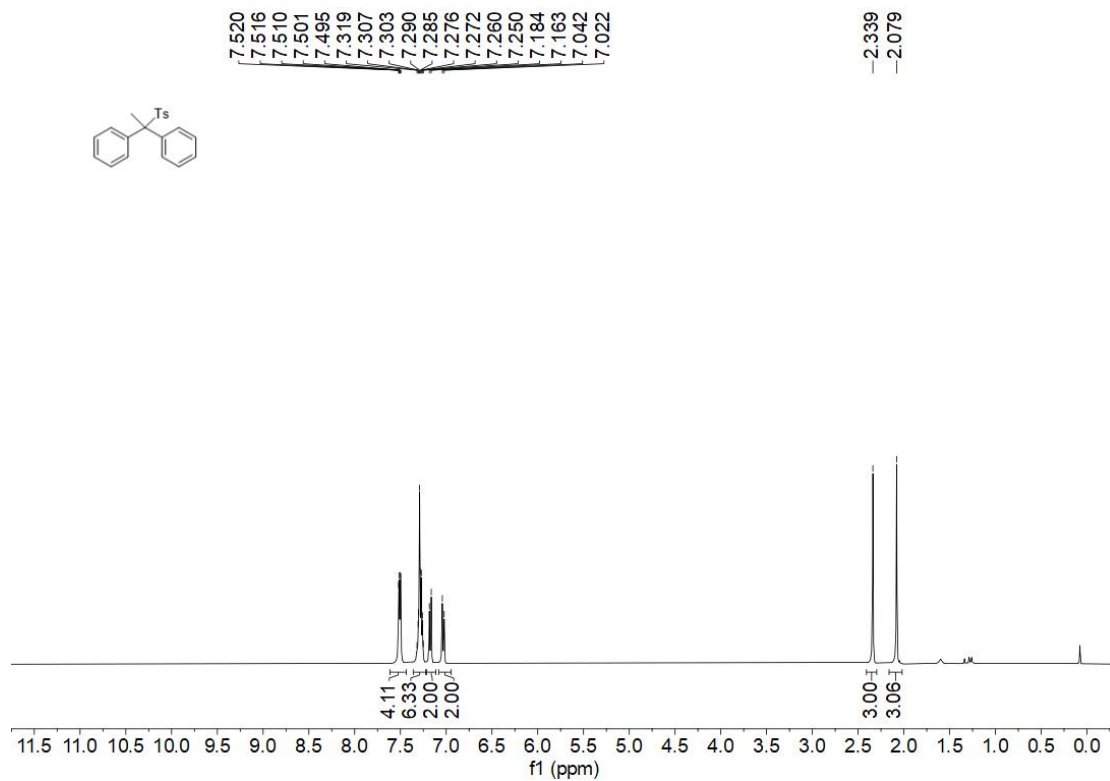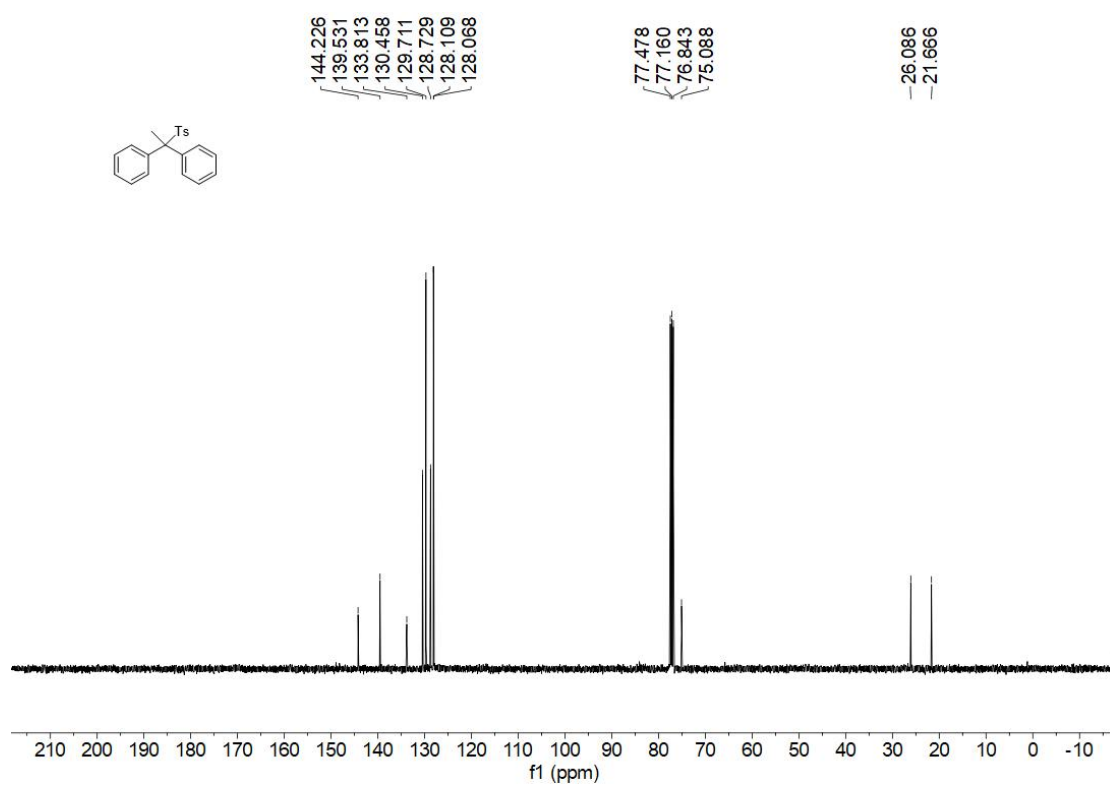

Supplement: d3nj04668k1.pdf [file d3nj04668k1.pdf]
